# Supplementary material for: Stereoselective Shi-type epoxidation with 3-oxo-4,6-O-benzylidene pyranoside catalysts: unveiling the role of carbohydrate skeletons
Source: Royal Society of Chemistry journal article supplement (doi:10.1039/d4ra03011g), 2024-01-01
Supplement: d4ra03011g1.pdf [file d4ra03011g1.pdf]

## Supporting Information

Daniela Imperio,<sup>\*a†</sup> Filippo Valloni,<sup>a</sup> Diego Caprioglio<sup>a</sup>, Alberto Minassi,<sup>a</sup>  
Emanuele Casali,<sup>\*b†</sup> and Luigi Panza<sup>a</sup>

<sup>a</sup> Department of Pharmaceutical Sciences, Università del Piemonte Orientale, Largo Donegani 2, 28100, Novara, Italy E-mail [daniela.imperio@uniupo.it](mailto:daniela.imperio@uniupo.it)

<sup>b</sup> University of Pavia, Department of Chemistry, Viale Taramelli, 12, 27100 Pavia, Italy;  
[emanuele.casali@unipv.it](mailto:emanuele.casali@unipv.it)

### **Contents:**

|                       |     |
|-----------------------|-----|
| Computational details | S2  |
| Hard copies of NMR    | S18 |
| HPLC Traces           | S29 |

## Computational details

All the calculations were performed by using the Gaussian 16 program package,<sup>1</sup> within B3LYP as a hybrid functional for DFT calculation.<sup>2,3</sup> The catalyst structures utilized in the study were manually prepared and conformationally sampled. Further confirmation of the most stable conformations was validated by using the open-source *CREST* tool, which is associated with the *xTB* software. The solvents involved in the reaction were specified during this process.<sup>4-6</sup> The basis set for the DFT optimization step was selected identical to all the atoms as 6-31g(d), as previously validated by our group and by Singleton and co-workers on similar systems.<sup>7-11</sup> Frequency calculations were performed for each species in order to confirm the minimum or transition state effective nature of the optimized structures. Single points calculations were then performed by using the M06-2X functional and by applying a triple zeta basis set to all the atoms: def2TZVP.<sup>12-13</sup> The role of the solvent was simulated using the SMD solvation model, with a specified list of seven parameters to resemble the ternary mixture of water (H<sub>2</sub>O), 1,2-dimethoxyethane (DME), and acetonitrile (MeCN).<sup>14</sup> Indeed, in order to account for the 4:6:2 ratio between H<sub>2</sub>O:DME: MeCN, a linear combination of the properties of the three solvents was employed.<sup>15,16</sup> These include the static dielectric constant of the solvent at 25 °C (*Eps*); dynamic (optical) dielectric constant (*EpsInf*); hydrogen bond acidity (*HBondAcidity*) and basicity (*HBondBasicity*), which are Abraham's A and B values respectively; the surface tension of the solvent at interface (*SurfaceTensionAtInterface*); carbon aromaticity – the fraction of aromatic carbons (*CarbonAromaticity*) and electronegative halogenicity – the fraction of halogens (*ElectronegativeHalogenicity*). Table S1 lists all the parameters for the three isolated solvents and the one arose from the linear combination.

| <i>Parameter</i>                   | <i>H<sub>2</sub>O</i> | <i>DME</i> | <i>MeCN</i> | <i>H<sub>2</sub>O:DME:MeCN</i><br><i>(4:6:2)</i> |
|------------------------------------|-----------------------|------------|-------------|--------------------------------------------------|
| <b>Eps</b>                         | 78.355                | 7.55       | 35.688      | 35.84                                            |
| <b>EpsInf</b>                      | 1.777849              | 1.896129   | 1.806874    | 1.841827                                         |
| <b>HBondAcidity</b>                | 0.0                   | 0.0        | 0.07        | 0.01                                             |
| <b>HBondBasicity</b>               | 0.0                   | 0.68       | 0.32        | 0.39                                             |
| <b>SurfaceTensionAtInterface</b>   | 0.0                   | 35.42167   | 41.25       | 24.59                                            |
| <b>CarbonAromaticity</b>           | 0.0                   | 0.0        | 0.0         | 0.0                                              |
| <b>ElectronegativeHalogenicity</b> | 0.0                   | 0.0        | 0.0         | 0.0                                              |

**Table S1.** List of seven parameters to simulate the mixture 4:6:2 of H<sub>2</sub>O:DME:MeCN.

These parameters were then specified in Gaussian 16 by using the keyword “SCRF = (SMD, solvent=generic, read)”. All data reported below, are referred to this level of theory and the discussions are based on the values of Gibbs relative energies in kcal/mol. Boltzmann population analysis was performed at the reaction specified temperature.

## Complete energy and population analysis for substrate **9** – Catalyst **1**

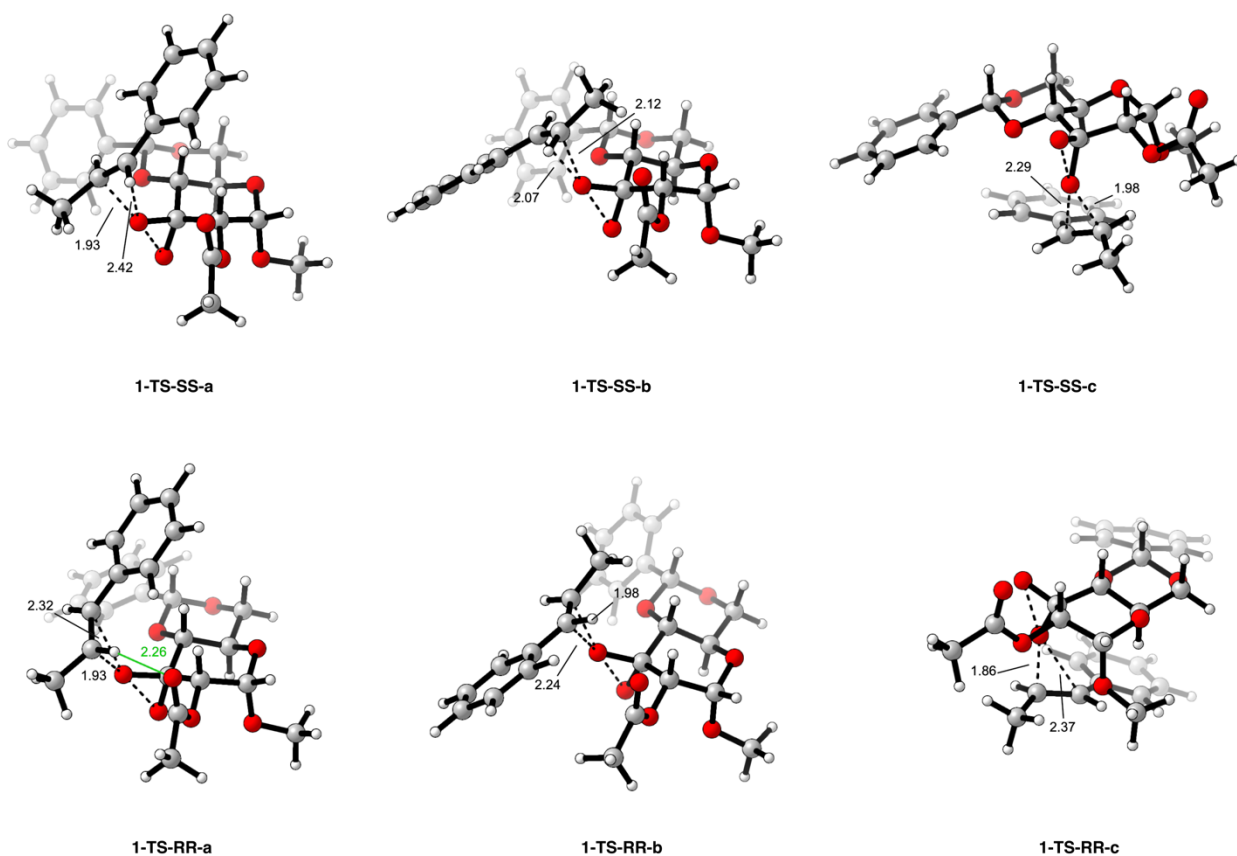

|           | $\Delta\Delta G$ (kcal mol <sup>-1</sup> ) | Boltzmann population | Comp | Exp  |
|-----------|--------------------------------------------|----------------------|------|------|
| 1-TS-SS-a | 2.2                                        | 1.8                  | 2.2  | 32.0 |
| 1-TS-SS-b | 3.1                                        | 0.3                  |      |      |
| 1-TS-SS-c | 3.5                                        | 0.1                  |      |      |
| 1-TS-RR-a | 0.0                                        | 94.5                 | 97.8 | 68.0 |
| 1-TS-RR-b | 1.8                                        | 3.3                  |      |      |
| 1-TS-RR-c | 4.9                                        | 0.0                  |      |      |

**Figure S1.** Most stable transition states for substrate **9** using catalyst **1** and displaying both the attack on the two enantiotopic faces of the olefinic substrate. In the table, relative Gibbs free energy values and Boltzmann population percentage (at 0 °C) are reported. In the images, the dashed bonds represent the ones broken or formed during the TS, while in green are highlighted the H-bonds. [SMD(Mix)-M06-2X/def2tzvp//B3LYP/6-31g(d)]

## Complete energy and population analysis of substrate **9** – Catalyst **2**

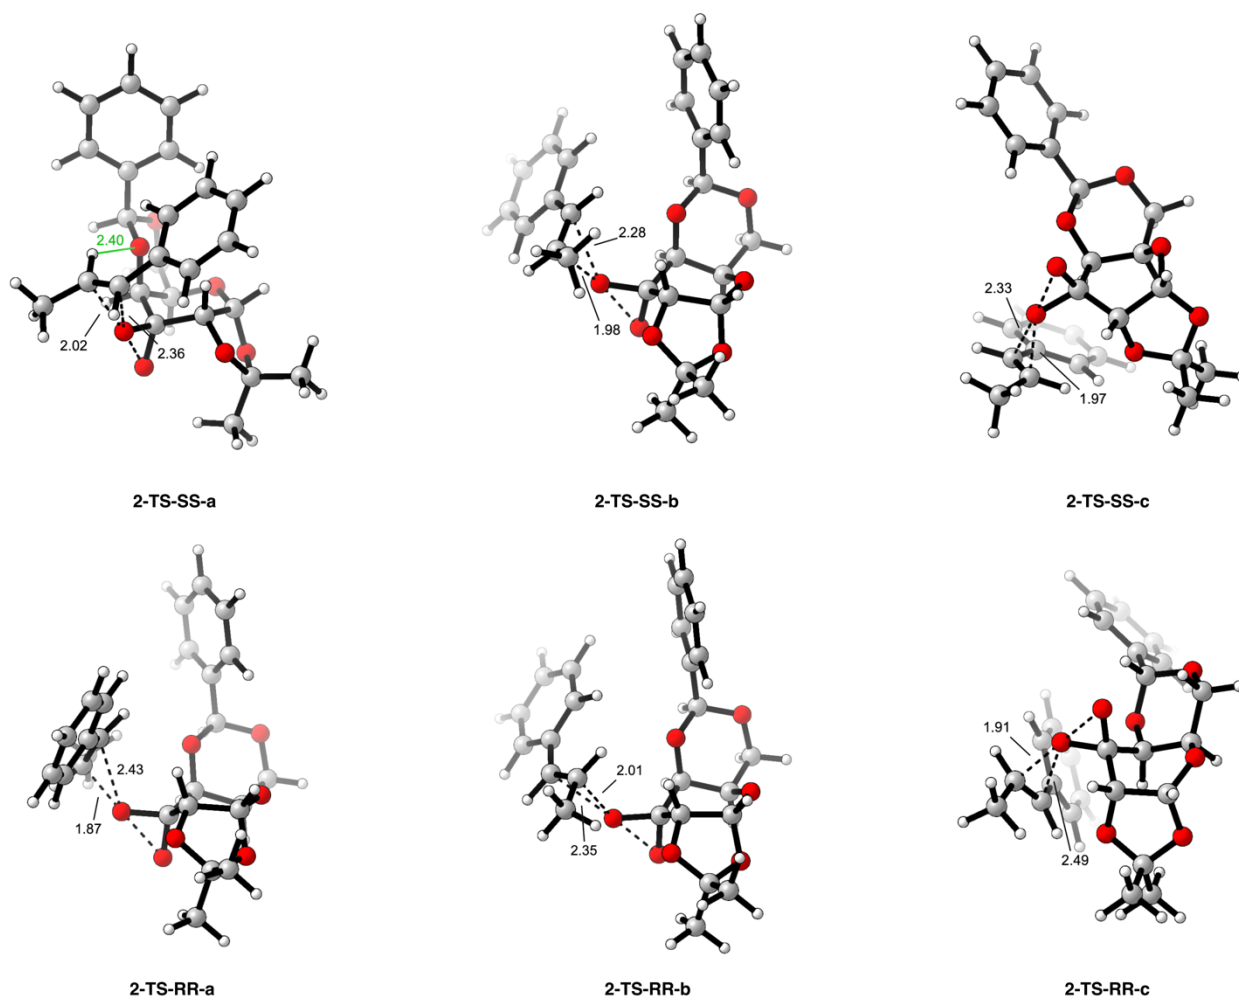

|           | $\Delta\Delta G$ (kcal mol <sup>-1</sup> ) | Boltzmann population | Comp | Exp  |
|-----------|--------------------------------------------|----------------------|------|------|
| 2-TS-SS-a | 0.0                                        | 48.1                 |      |      |
| 2-TS-SS-b | 0.2                                        | 34.5                 | 89.5 | 84.0 |
| 2-TS-SS-c | 1.1                                        | 6.9                  |      |      |
| 2-TS-RR-a | 0.9                                        | 9.2                  |      |      |
| 2-TS-RR-b | 2.1                                        | 1.1                  | 10.5 | 16.0 |
| 2-TS-RR-c | 2.9                                        | 0.2                  |      |      |

**Figure S2.** Most stable transition states for substrate **9** using catalyst **2** and displaying both the attach on the two enantiotopic faces of the olefinic substrate. In the table, relative Gibbs free energy values and Boltzmann population percentage (at 0 °C) are reported. In the images, the dashed bonds represent the ones broken or formed during the TS, while in green are highlighted the H-bonds. [SMD(Mix)-M06-2X/def2tzvp//B3LYP/6-31g(d)]

## Cartesian coordinates

|                                |             |             |             |   |             |             |             |
|--------------------------------|-------------|-------------|-------------|---|-------------|-------------|-------------|
| <b>1-TS-SS-a</b>               |             |             |             | C | 4.01042100  | -0.46918000 | 1.30751300  |
| B3LYP/6-31g(d),                |             |             |             | O | 4.07673600  | 0.68707300  | 0.94200400  |
| el. energy = -1571.138258 a.u. |             |             |             | C | 4.89073400  | -1.09469500 | 2.36196900  |
| im. frequency -371.33          |             |             |             | H | 4.28152900  | -1.33230200 | 3.24078800  |
| C                              | 2.11595100  | -0.96207000 | -0.07474600 | H | 5.31583900  | -2.03463400 | 1.99799800  |
| C                              | 0.76814700  | -0.82852700 | 0.68854300  | H | 5.68418800  | -0.39957200 | 2.63898400  |
| C                              | -0.32230800 | -0.54482100 | -0.35192600 | H | 2.27995900  | 2.41124200  | 1.78546100  |
| O                              | 0.81876000  | 0.06074000  | 1.80019700  | H | -0.72672000 | 1.81937700  | 1.47701600  |
| C                              | 1.32655300  | 2.36990300  | 1.26560900  | C | 1.33506800  | 2.80499200  | -0.11986200 |
| C                              | 0.23642900  | 1.89553700  | 1.97413800  | C | 2.57281400  | 2.98783900  | -0.77566300 |
| H                              | 2.38858500  | -0.00023900 | -0.51626100 | C | 0.15167900  | 3.10724400  | -0.83203400 |
| C                              | -0.32692100 | -1.69687800 | -1.36323700 | C | 2.62235400  | 3.44085500  | -2.09082500 |
| C                              | 2.02558000  | -2.00207600 | -1.21293300 | H | 3.48603100  | 2.74029800  | -0.24504600 |
| H                              | 2.90256100  | -1.91802900 | -1.87094900 | C | 0.20761000  | 3.56087600  | -2.14538100 |
| H                              | -0.48399300 | -2.63973900 | -0.82757900 | H | -0.81252700 | 3.01275200  | -0.34169100 |
| O                              | 0.92014700  | -1.71038400 | -2.06316700 | C | 1.44232000  | 3.72818800  | -2.78131500 |
| O                              | 1.95082900  | -3.27736400 | -0.65485300 | H | 3.58407600  | 3.56941500  | -2.57974700 |
| O                              | 3.14183400  | -1.38296200 | 0.82842800  | H | -0.71233900 | 3.79648400  | -2.67348400 |
| O                              | -1.59677100 | -0.40487000 | 0.25795900  | H | 1.48231000  | 4.08621600  | -3.80637600 |
| C                              | -1.46451800 | -1.47355700 | -2.35190500 | C | 0.19001400  | 1.88301700  | 3.47460200  |
| H                              | -1.60325100 | -2.32896200 | -3.01789100 | H | 1.19473700  | 1.83088100  | 3.90424300  |
| H                              | -1.25746900 | -0.57990000 | -2.96363800 | H | -0.29457400 | 2.79913500  | 3.83786600  |
| O                              | -2.67824700 | -1.31844400 | -1.61809100 | H | -0.38891200 | 1.02568200  | 3.82735500  |
| C                              | -2.62044500 | -0.23358000 | -0.70570300 | C | -3.94933900 | -0.14053000 | 0.00366400  |
| H                              | -2.41278100 | 0.68788600  | -1.28341700 | C | -4.98736700 | 0.60129400  | -0.56667600 |
| H                              | -0.07087600 | 0.37873500  | -0.89933900 | C | -4.16495200 | -0.82200500 | 1.20589500  |
| O                              | 0.53122700  | -1.76736800 | 1.60843700  | C | -6.23401800 | 0.66487300  | 0.05673300  |
| C                              | 2.12089400  | -4.32682300 | -1.59799400 | H | -4.82084400 | 1.12790400  | -1.50387800 |
| H                              | 1.33184500  | -4.32089900 | -2.35969700 | C | -5.41054000 | -0.75563300 | 1.83026500  |
| H                              | 3.09772200  | -4.25197100 | -2.09964400 | H | -3.35023800 | -1.38732200 | 1.64573400  |
| H                              | 2.07693400  | -5.26074000 | -1.03395900 | C | -6.44674600 | -0.01418100 | 1.25783200  |

|                                |             |             |             |   |             |             |             |
|--------------------------------|-------------|-------------|-------------|---|-------------|-------------|-------------|
| H                              | -7.03578400 | 1.24481100  | -0.39271600 | C | -4.25516900 | 1.39605400  | -0.04155700 |
| H                              | -5.57263100 | -1.28429300 | 2.76593600  | O | -4.17647100 | 1.70891300  | 1.12941200  |
| H                              | -7.41597600 | 0.03606500  | 1.74724800  | C | -5.04163600 | 2.15009700  | -1.08609600 |
| <b>1-TS-SS-b</b>               |             |             |             | H | -4.34758600 | 2.58346600  | -1.81419500 |
| B3LYP/6-31g(d),                |             |             |             | H | -5.70096300 | 1.46911600  | -1.63245800 |
| el. energy = -1571.132295 a.u. |             |             |             | H | -5.62229000 | 2.94075300  | -0.60955100 |
| im. frequency -381.43          |             |             |             | H | -1.45759400 | 3.18877200  | 1.32693500  |
| C                              | -2.75248200 | -0.46006800 | 0.18266800  | C | -1.49515800 | 1.62322100  | 2.87437100  |
| C                              | -1.28762100 | -0.16387700 | -0.26104000 | H | -0.95222800 | 0.70403600  | 3.11800000  |
| C                              | -0.37536600 | -1.16408200 | 0.47171900  | H | -1.44550500 | 2.27901700  | 3.75675000  |
| O                              | -0.89517400 | 1.22760400  | -0.10139500 | H | -2.55125300 | 1.40469900  | 2.69936700  |
| C                              | -0.89850100 | 2.33841600  | 1.70517300  | H | 0.91409600  | 1.25108800  | 1.63774700  |
| C                              | 0.38891700  | 2.12010200  | 1.25036800  | C | 1.17308000  | 2.98434400  | 0.37417000  |
| H                              | -2.88508900 | -0.22747300 | 1.24123700  | C | 2.35923400  | 2.47423700  | -0.18536400 |
| C                              | -0.83515200 | -2.58112000 | 0.11418300  | C | 0.80264300  | 4.31018200  | 0.08342500  |
| C                              | -3.12007000 | -1.94780000 | -0.01693700 | C | 3.14642500  | 3.26320200  | -1.01845400 |
| H                              | -4.06099000 | -2.17408700 | 0.50546700  | H | 2.63887300  | 1.44422000  | 0.01537900  |
| H                              | -0.81130300 | -2.69299200 | -0.97561700 | C | 1.59312500  | 5.09787600  | -0.74767200 |
| O                              | -2.15719200 | -2.78513100 | 0.61844300  | H | -0.09790300 | 4.73087700  | 0.52070400  |
| O                              | -3.24106600 | -2.20925400 | -1.37989600 | C | 2.76652400  | 4.57739800  | -1.30135900 |
| O                              | -3.65757100 | 0.32331600  | -0.59833400 | H | 4.05410100  | 2.85063700  | -1.44976600 |
| O                              | 0.98880100  | -0.97841200 | 0.12352300  | H | 1.29765200  | 6.12138700  | -0.96138500 |
| C                              | 0.11395300  | -3.58612000 | 0.75442200  | H | 3.38251400  | 5.19579100  | -1.94870700 |
| H                              | -0.08491300 | -4.60797200 | 0.42181100  | C | 3.24141200  | -1.72287500 | 0.26403300  |
| H                              | 0.01537500  | -3.54771700 | 1.85201400  | C | 4.30447600  | -1.89619100 | 1.15366000  |
| O                              | 1.44653500  | -3.27149000 | 0.35277000  | C | 3.50110900  | -1.36788900 | -1.06525400 |
| C                              | 1.82316300  | -1.95644900 | 0.72224300  | C | 5.62047700  | -1.71757700 | 0.72339800  |
| H                              | 1.74076300  | -1.86860300 | 1.82290100  | H | 4.10339200  | -2.17441400 | 2.18582300  |
| H                              | -0.49780900 | -1.04092300 | 1.56288000  | C | 4.81586600  | -1.18633900 | -1.49354900 |
| O                              | -1.11879800 | 0.01253500  | -1.55623700 | H | 2.66838500  | -1.22503100 | -1.74608200 |
| C                              | -3.83268900 | -3.46801900 | -1.67192100 | C | 5.87730700  | -1.36213800 | -0.60149300 |
| H                              | -3.22685900 | -4.30002900 | -1.29282700 | H | 6.44181400  | -1.85344600 | 1.42190100  |
| H                              | -4.84225100 | -3.53956700 | -1.23939900 | H | 5.01286300  | -0.91002400 | -2.52606200 |
| H                              | -3.90202700 | -3.53295800 | -2.75968000 | H | 6.90100700  | -1.22079300 | -0.93832100 |

**1-TS-SS-c**

B3LYP/6-31g(d),

el. energy = -1571.135374 a.u.

im. frequency -369.78

|   |             |             |             |
|---|-------------|-------------|-------------|
| C | -2.53664200 | -1.04329100 | -0.65219800 |
| C | -1.21221100 | -1.42147100 | 0.06928500  |
| C | -0.04680700 | -1.16983800 | -0.90207800 |
| O | -1.02518200 | -0.93906400 | 1.41556800  |
| C | -1.57070600 | 0.76280000  | 2.26102300  |
| C | -0.20839600 | 1.00184800  | 2.31978000  |
| H | -2.73633300 | -1.87764700 | -1.33196500 |
| C | -0.15182700 | 0.17113400  | -1.63094200 |
| C | -2.52362800 | 0.21376200  | -1.54886300 |
| H | -3.36575800 | 0.16215300  | -2.24922800 |
| H | -0.10639100 | 0.98985700  | -0.90840900 |
| O | -1.37227900 | 0.22670300  | -2.37508700 |
| O | -2.63675600 | 1.36929200  | -0.75622100 |
| O | -3.58953500 | -0.98679200 | 0.31645000  |
| O | 1.20871900  | -1.25205400 | -0.24749000 |
| C | 1.02768200  | 0.28394800  | -2.59502600 |
| H | 1.08581100  | 1.27416100  | -3.05345700 |
| H | 0.92551500  | -0.47023300 | -3.39245900 |
| O | 2.24062800  | 0.09375700  | -1.86923400 |
| C | 2.26591800  | -1.14481100 | -1.18096200 |
| H | 2.14531500  | -1.95357500 | -1.92857100 |
| H | -0.11949300 | -1.96809700 | -1.66284100 |
| C | -2.91122700 | 2.54322400  | -1.51398500 |
| H | -2.08277200 | 2.79019800  | -2.18742700 |
| H | -3.82858800 | 2.41972500  | -2.10716400 |
| H | -3.05488900 | 3.35540800  | -0.79770400 |
| C | -4.82387100 | -1.36513600 | -0.09954600 |
| O | -5.08819900 | -1.66584400 | -1.24300400 |
| C | -5.79771600 | -1.36104100 | 1.05360900  |
| H | -5.49782000 | -2.11335000 | 1.79097900  |
| H | -5.79067200 | -0.38783600 | 1.55446300  |

|   |             |             |             |
|---|-------------|-------------|-------------|
| H | -6.79900600 | -1.58555600 | 0.68474300  |
| O | -1.23825500 | -2.61982700 | 0.64961200  |
| H | -2.15423400 | 1.25687900  | 1.48905500  |
| H | 0.35683400  | 0.43912400  | 3.06014200  |
| C | 0.55759400  | 1.93296900  | 1.50857600  |
| C | 1.94551700  | 1.73891700  | 1.36034000  |
| C | -0.03356800 | 3.05799600  | 0.89532200  |
| C | 2.71035400  | 2.61768700  | 0.60015300  |
| H | 2.40949700  | 0.86785300  | 1.81311900  |
| C | 0.73650500  | 3.94276000  | 0.14748300  |
| H | -1.09430700 | 3.24366100  | 1.02957200  |
| C | 2.10959500  | 3.72328300  | -0.00671000 |
| H | 3.77265000  | 2.43282600  | 0.47291000  |
| H | 0.27017900  | 4.81187600  | -0.30890300 |
| H | 2.70806000  | 4.41500900  | -0.59331500 |
| C | -2.33841300 | 0.14298400  | 3.38968300  |
| H | -3.13720200 | -0.49028800 | 2.99716900  |
| H | -1.68978500 | -0.46447300 | 4.02760500  |
| H | -2.79246300 | 0.92954100  | 4.00918000  |
| C | 3.58300200  | -1.28047500 | -0.44948100 |
| C | 3.65824800  | -2.04721500 | 0.71930300  |
| C | 4.74199100  | -0.68589600 | -0.96082500 |
| C | 4.88130500  | -2.20985800 | 1.37199800  |
| H | 2.75589500  | -2.50317100 | 1.11270300  |
| C | 5.96301100  | -0.85128600 | -0.30539000 |
| H | 4.67926900  | -0.09009200 | -1.86518000 |
| C | 6.03614000  | -1.61340400 | 0.86223400  |
| H | 4.93055200  | -2.80434600 | 2.28058200  |
| H | 6.85801200  | -0.38393200 | -0.70812700 |
| H | 6.98787700  | -1.74258600 | 1.37109700  |

**1-TS-RR-a**

B3LYP/6-31g(d),

el. energy = -1571.138364 a.u.

im. frequency -377.68

|   |             |             |             |                                |             |             |             |
|---|-------------|-------------|-------------|--------------------------------|-------------|-------------|-------------|
| C | -2.29179400 | -0.71955500 | 0.09631600  | H                              | 0.67639800  | 3.30170000  | 4.28747500  |
| C | -1.00916100 | -0.60250400 | -0.77027200 | C                              | -1.84870800 | 2.56095100  | -2.98685500 |
| C | 0.18118200  | -0.68213500 | 0.19994700  | H                              | -2.32143300 | 3.53995000  | -3.14356500 |
| O | -0.96208400 | 0.52655700  | -1.66859000 | H                              | -0.91292900 | 2.53222800  | -3.55242600 |
| C | -1.61087900 | 2.33820300  | -1.52199400 | H                              | -2.51606000 | 1.79255600  | -3.38650700 |
| C | -0.40646900 | 2.64890700  | -0.91324200 | C                              | -2.65572000 | -4.31586100 | 0.85752000  |
| H | 0.45271000  | 2.79270100  | -1.56518800 | H                              | -1.81827200 | -4.57697600 | 1.51554400  |
| H | -2.50036500 | 2.23418700  | -0.90871500 | H                              | -3.57183000 | -4.24119800 | 1.46326200  |
| H | -2.36464900 | 0.13929200  | 0.76737900  | H                              | -2.78491100 | -5.09531600 | 0.10393800  |
| C | 0.10744900  | -2.00884400 | 0.96414700  | C                              | -4.36391500 | 0.22154400  | -0.64497000 |
| C | -2.26731100 | -1.99252300 | 0.97418600  | O                              | -4.25256400 | 1.20155400  | 0.06889500  |
| H | -3.08128600 | -1.94880400 | 1.71311700  | C                              | -5.53063200 | -0.04698700 | -1.56414100 |
| H | 0.11408700  | -2.83386700 | 0.24330800  | H                              | -5.17553900 | -0.14110900 | -2.59544200 |
| O | -1.08307300 | -2.03488100 | 1.75850600  | H                              | -6.00450600 | -0.99752500 | -1.29908000 |
| O | -2.41252400 | -3.10735100 | 0.15000200  | H                              | -6.25327500 | 0.76595100  | -1.48721500 |
| O | -3.46195500 | -0.77468400 | -0.72898200 | C                              | 3.80102000  | -0.55488800 | -0.34661700 |
| O | 1.41708300  | -0.59133000 | -0.48668500 | C                              | 5.00498700  | -0.90135900 | 0.27766700  |
| C | 1.32251500  | -2.11271400 | 1.88137200  | C                              | 3.82142800  | -0.04064100 | -1.64661100 |
| H | 1.39651800  | -3.09699100 | 2.35089400  | C                              | 6.21690400  | -0.73402800 | -0.39136400 |
| H | 1.25350600  | -1.34782600 | 2.67249700  | H                              | 4.98538000  | -1.31519000 | 1.28111300  |
| O | 2.50395300  | -1.93445800 | 1.10366300  | C                              | 5.03653400  | 0.12503500  | -2.31427300 |
| C | 2.50041200  | -0.69517600 | 0.41255700  | H                              | 2.88407400  | 0.21013600  | -2.13054000 |
| H | 2.39940300  | 0.10988700  | 1.16745200  | C                              | 6.23602600  | -0.21830500 | -1.68935500 |
| H | 0.10404500  | 0.13450300  | 0.93636600  | H                              | 7.14660600  | -1.01052000 | 0.09930300  |
| O | -0.95466000 | -1.34190100 | -1.87006400 | H                              | 5.04350700  | 0.51795800  | -3.32776900 |
| C | -0.15586000 | 2.80670000  | 0.50611700  | H                              | 7.18073700  | -0.08905800 | -2.21125300 |
| C | 1.17077400  | 3.02795700  | 0.93491800  |                                |             |             |             |
| C | -1.17857800 | 2.77118800  | 1.48192500  | <b>1-TS-RR-b</b>               |             |             |             |
| C | 1.46883500  | 3.20516100  | 2.28274500  | B3LYP/6-31g(d),                |             |             |             |
| H | 1.96708000  | 3.05315700  | 0.19537800  | el. energy = -1571.135007 a.u. |             |             |             |
| C | -0.87385000 | 2.94442600  | 2.82787000  | im. frequency -390.65          |             |             |             |
| H | -2.21054300 | 2.60687400  | 1.18667600  | C                              | 1.12283900  | 1.79107200  | 0.29898700  |
| C | 0.44691100  | 3.16306800  | 3.23464000  | C                              | 0.20225200  | 0.67097800  | -0.25670700 |
| H | 2.49643000  | 3.37575700  | 2.59120400  | C                              | -1.14931100 | 0.81089000  | 0.46884800  |
| H | -1.67090400 | 2.91377400  | 3.56544100  | O                              | 0.81596700  | -0.65203800 | -0.23420500 |



|   |             |             |             |
|---|-------------|-------------|-------------|
| C | 2.16646900  | -1.66615700 | 1.23998200  |
| C | 0.83976800  | -2.05223100 | 1.16298000  |
| H | 1.31489100  | 1.61596800  | 1.36040800  |
| C | -1.69165400 | 2.21550700  | 0.17195200  |
| C | 0.47267300  | 3.18687600  | 0.16713900  |
| H | 1.04060300  | 3.92062900  | 0.75767000  |
| H | -1.75112300 | 2.34765000  | -0.91396700 |
| O | -0.82289900 | 3.18817100  | 0.75703500  |
| O | 0.45202200  | 3.54923500  | -1.17847700 |
| O | 2.36760800  | 1.81076500  | -0.40313000 |
| O | -2.06908400 | -0.17900600 | 0.03945500  |
| C | -3.08224000 | 2.34654200  | 0.77952900  |
| H | -3.56855600 | 3.28129700  | 0.48932800  |
| H | -3.01588700 | 2.31080100  | 1.87976800  |
| O | -3.89382300 | 1.28408000  | 0.28367900  |
| C | -3.35724500 | 0.01021200  | 0.59934200  |
| H | -3.27925900 | -0.06432100 | 1.70150300  |
| H | -1.00286700 | 0.73715100  | 1.55943200  |
| O | 0.15693000  | 0.50938300  | -1.56695700 |
| C | 0.11490300  | 4.91203900  | -1.40032300 |
| H | -0.89679500 | 5.14341800  | -1.04579600 |
| H | 0.82826300  | 5.58216100  | -0.89676700 |
| H | 0.16956200  | 5.07325900  | -2.47886500 |
| C | 3.49642800  | 1.53372200  | 0.28195500  |
| O | 3.53844700  | 1.27647100  | 1.46991900  |
| C | 4.69053800  | 1.57170000  | -0.63920300 |
| H | 4.61834200  | 2.41311600  | -1.33297700 |
| H | 5.60615400  | 1.63456000  | -0.04944100 |
| H | 4.70847600  | 0.65080600  | -1.23239200 |
| H | 0.56533300  | -2.83830800 | 0.46670100  |
| C | -0.15876600 | -1.79249100 | 2.24845800  |
| H | 0.13034600  | -0.94845500 | 2.88267600  |
| H | -1.14850600 | -1.61338600 | 1.82166500  |
| H | -0.23281600 | -2.68248600 | 2.88912000  |
| C | 3.26132900  | -2.16538600 | 0.42501600  |

|   |             |             |             |
|---|-------------|-------------|-------------|
| C | 4.58153100  | -1.84623000 | 0.80456900  |
| C | 3.06662900  | -2.97478900 | -0.71407500 |
| C | 5.66874200  | -2.34167700 | 0.08913700  |
| H | 4.74142500  | -1.19701000 | 1.66041100  |
| C | 4.15451600  | -3.45710100 | -1.43198200 |
| H | 2.06073100  | -3.19786000 | -1.05377000 |
| C | 5.45940600  | -3.15028100 | -1.03014000 |
| H | 6.67923400  | -2.09249600 | 0.40133200  |
| H | 3.98765500  | -4.07091700 | -2.31272800 |
| H | 6.30633500  | -3.53390200 | -1.59250100 |
| H | 2.43858200  | -0.93997400 | 2.00279500  |
| C | -4.28558100 | -1.04524800 | 0.04965900  |
| C | -5.36889700 | -1.48099500 | 0.81751700  |
| C | -4.09551200 | -1.56141400 | -1.23630500 |
| C | -6.25914900 | -2.42664000 | 0.30764500  |
| H | -5.51821700 | -1.07682000 | 1.81633400  |
| C | -4.98436600 | -2.50890500 | -1.74416800 |
| H | -3.24550700 | -1.22429800 | -1.81998600 |
| C | -6.06706000 | -2.94239200 | -0.97537000 |
| H | -7.09846700 | -2.76151500 | 0.91143000  |
| H | -4.83133700 | -2.90973200 | -2.74276100 |
| H | -6.75739100 | -3.68142600 | -1.37384700 |

**1-TS-RR-c**

B3LYP/6-31g(d),

el. energy = -1571.129827 a.u.

im. frequency -375.74

|   |            |             |             |
|---|------------|-------------|-------------|
| C | 2.79803700 | -0.93976000 | 0.06269000  |
| C | 1.45184000 | -0.83012700 | -0.70757300 |
| C | 0.35616700 | -1.35959400 | 0.24036000  |
| O | 1.12423400 | 0.41548000  | -1.38357600 |
| C | 1.30464700 | 2.25987900  | -1.24832900 |
| C | 0.46118900 | 2.32917400  | -0.14474200 |
| H | 0.94194600 | 2.34842400  | 0.83063300  |
| H | 0.84884200 | 2.39219400  | -2.22550100 |

|   |             |             |             |                                |             |             |             |
|---|-------------|-------------|-------------|--------------------------------|-------------|-------------|-------------|
| H | 3.01004500  | -2.01302800 | 0.08403200  | C                              | 4.84088100  | -1.09176000 | -1.15175200 |
| C | 0.45225900  | -0.79345700 | 1.65976100  | O                              | 4.97509200  | -2.26132400 | -0.87688600 |
| C | 2.80777300  | -0.50060300 | 1.53795100  | C                              | 5.73696300  | -0.30006800 | -2.07156600 |
| H | 3.70583800  | -0.90117700 | 2.02759700  | H                              | 6.63428800  | -0.87868400 | -2.29378300 |
| H | 0.29050800  | 0.28858300  | 1.62997100  | H                              | 5.19830400  | -0.09285400 | -3.00301300 |
| O | 1.72585700  | -1.09676400 | 2.23574300  | H                              | 6.00377900  | 0.66060200  | -1.62147500 |
| O | 2.80168800  | 0.90132800  | 1.64627700  | O                              | 1.47582100  | -1.37925800 | -1.91469200 |
| O | 3.84459200  | -0.29869300 | -0.66544200 | C                              | -3.28390800 | -1.54234800 | -0.06110800 |
| O | -0.94632500 | -1.12764900 | -0.26787600 | C                              | -3.42120000 | -1.55533500 | -1.45416400 |
| C | -0.64462700 | -1.43403700 | 2.50930200  | C                              | -4.41824700 | -1.39733900 | 0.74295100  |
| H | -0.71156500 | -0.97798800 | 3.50054400  | C                              | -4.68247500 | -1.42044500 | -2.03481800 |
| H | -0.43652800 | -2.50959200 | 2.63000400  | H                              | -2.53588400 | -1.65964600 | -2.07284400 |
| O | -1.90205700 | -1.22749500 | 1.87125200  | C                              | -5.67872300 | -1.25982900 | 0.15869400  |
| C | -1.91758800 | -1.74767200 | 0.55285400  | H                              | -4.30711400 | -1.38517800 | 1.82163200  |
| H | -1.67547700 | -2.82736300 | 0.61163700  | C                              | -5.81476400 | -1.27201400 | -1.23043100 |
| H | 0.53609700  | -2.44792400 | 0.30693000  | H                              | -4.78059600 | -1.43266500 | -3.11739600 |
| C | -0.98301000 | 2.39777300  | -0.15341200 | H                              | -6.55540600 | -1.14497600 | 0.79120000  |
| C | -1.64603800 | 2.74932300  | 1.04202100  | H                              | -6.79746500 | -1.16989700 | -1.68394600 |
| C | -1.76197800 | 2.14793500  | -1.30448200 |                                |             |             |             |
| C | -3.03005300 | 2.87910000  | 1.08115200  | <b>2-TS-SS-a</b>               |             |             |             |
| H | -1.05850500 | 2.93213800  | 1.93875700  | B3LYP/6-31g(d),                |             |             |             |
| C | -3.14421500 | 2.26674800  | -1.25790600 | el. energy = -1495.913833 a.u. |             |             |             |
| H | -1.27913100 | 1.81049400  | -2.21516500 | im. frequency -349.42          |             |             |             |
| C | -3.78380200 | 2.63824300  | -0.06947500 | C                              | 1.76802800  | -0.01530700 | -0.31783500 |
| H | -3.52232800 | 3.15626600  | 2.00903600  | C                              | 1.40446600  | -0.55764300 | 1.07918800  |
| H | -3.73333700 | 2.04714200  | -2.14315500 | C                              | 0.27487200  | -1.58743200 | 1.00556300  |
| H | -4.86640900 | 2.72115200  | -0.03912100 | O                              | 1.28000600  | 0.42700500  | 2.10711200  |
| C | 2.76482600  | 2.59771800  | -1.19158300 | C                              | 0.13496700  | 2.47710400  | 1.88021300  |
| H | 2.88957800  | 3.67627100  | -1.36347300 | C                              | -0.41995300 | 1.41902900  | 2.56828400  |
| H | 3.20390500  | 2.33282400  | -0.22915200 | H                              | 0.87457000  | 3.07196100  | 2.41383100  |
| H | 3.30209800  | 2.06483900  | -1.97915100 | C                              | -0.15912500 | 2.91819700  | 0.52770500  |
| C | 3.11801300  | 1.36372100  | 2.95640900  | C                              | 0.60263100  | 3.97407600  | -0.01520100 |
| H | 2.38916700  | 1.00900500  | 3.69415500  | C                              | -1.19237700 | 2.36499900  | -0.26032500 |
| H | 4.12111600  | 1.02934400  | 3.25756900  | C                              | 0.34592100  | 4.46089000  | -1.29308600 |
| H | 3.10121500  | 2.45530200  | 2.91823800  | H                              | 1.40517100  | 4.40506500  | 0.57789400  |

|   |             |             |             |                                |             |             |             |
|---|-------------|-------------|-------------|--------------------------------|-------------|-------------|-------------|
| C | -1.44418600 | 2.85271200  | -1.53781900 | O                              | 2.40946800  | -0.99460800 | 1.85845400  |
| H | -1.79153500 | 1.54647400  | 0.12187600  | H                              | -1.16196600 | 0.79957700  | 2.07416000  |
| C | -0.67986300 | 3.90217300  | -2.05916200 | C                              | -3.20973600 | -1.27457000 | -0.11913600 |
| H | 0.94610700  | 5.27342500  | -1.69282800 | C                              | -4.27400900 | -0.96704300 | 0.73108400  |
| H | -2.24322200 | 2.41136900  | -2.12671300 | C                              | -3.26849100 | -0.89811300 | -1.46692700 |
| H | -0.88380000 | 4.28161200  | -3.05674700 | C                              | -5.39228700 | -0.28610900 | 0.24362800  |
| C | -0.30805700 | 1.27228600  | 4.05684000  | H                              | -4.23254200 | -1.26466200 | 1.77655300  |
| H | 0.56347800  | 1.80678500  | 4.44637800  | C                              | -4.38561800 | -0.22125100 | -1.95392200 |
| H | -1.20636600 | 1.67693600  | 4.54387000  | H                              | -2.44040800 | -1.15290000 | -2.12038000 |
| H | -0.21891000 | 0.21908300  | 4.33754800  | C                              | -5.44867400 | 0.08763800  | -1.09910800 |
| H | 1.02797100  | 0.72920000  | -0.62278200 | H                              | -6.21794500 | -0.05361500 | 0.91070400  |
| C | 0.71166800  | -2.72221800 | 0.06711300  | H                              | -4.43267800 | 0.05966800  | -3.00293400 |
| C | 1.87327700  | -1.15353700 | -1.35671000 | H                              | -6.31954500 | 0.61336400  | -1.48162100 |
| H | 1.71251300  | -0.77212400 | -2.37344000 |                                |             |             |             |
| H | 1.59098000  | -3.22786500 | 0.48658400  |                                |             |             |             |
| O | 0.98945800  | -2.21958300 | -1.24209200 | <b>2-TS-SS-b</b>               |             |             |             |
| O | 3.22571800  | -1.56945000 | -1.19273500 | B3LYP/6-31g(d),                |             |             |             |
| O | 3.05572200  | 0.56631200  | -0.35926800 | el. energy = -1495.911864 a.u. |             |             |             |
| O | -0.93881000 | -1.00702800 | 0.51630300  | im. frequency -346.80          |             |             |             |
| C | -0.44838900 | -3.69692600 | -0.09547700 | C                              | -2.20090400 | -0.11630100 | 0.61554200  |
| H | -0.60451300 | -4.23978200 | 0.85109000  | C                              | -1.41465500 | 0.71483900  | -0.41647600 |
| H | -0.24185300 | -4.41722900 | -0.88992900 | C                              | -0.44481000 | -0.17805400 | -1.19080400 |
| O | -1.64042600 | -3.01333300 | -0.47861300 | O                              | -0.84832200 | 1.94764500  | 0.05746500  |
| C | 3.99026900  | -0.39812700 | -0.90354800 | C                              | -0.04809000 | 2.45495700  | 1.79668500  |
| C | -1.98292000 | -1.97565700 | 0.40601900  | C                              | 1.09456600  | 1.89747300  | 1.25554100  |
| H | -2.16154600 | -2.39655800 | 1.41375400  | H                              | 1.31031700  | 0.86206900  | 1.50869000  |
| C | 5.05844700  | -0.74614100 | 0.12228800  | H                              | -0.25157900 | 3.50509400  | 1.60885700  |
| H | 5.65043200  | 0.14430000  | 0.35731300  | H                              | -1.55289600 | -0.37172200 | 1.45759300  |
| H | 4.57908100  | -1.10536800 | 1.03358100  | C                              | -1.26187200 | -1.25993300 | -1.91335800 |
| H | 5.72693300  | -1.51562000 | -0.27821300 | C                              | -2.78298100 | -1.39372000 | -0.02754300 |
| C | 4.57352200  | 0.19432800  | -2.18876800 | H                              | -2.97902000 | -2.15853300 | 0.73566200  |
| H | 5.07839400  | 1.14027300  | -1.96843400 | H                              | -1.92338000 | -0.78746000 | -2.65027900 |
| H | 5.29721700  | -0.49679500 | -2.63273000 | O                              | -2.01791600 | -2.04480300 | -0.98372000 |
| H | 3.78228100  | 0.39103500  | -2.91875200 | O                              | -4.01352700 | -0.90837300 | -0.55955000 |
| H | 0.12630200  | -1.98227900 | 2.02168700  | O                              | -3.35392100 | 0.54695000  | 1.09422700  |
|   |             |             |             | O                              | 0.50555000  | -0.79709500 | -0.31888400 |

|   |             |             |             |
|---|-------------|-------------|-------------|
| C | -0.29852700 | -2.22940000 | -2.58888500 |
| H | 0.19011300  | -1.72294300 | -3.43751000 |
| H | -0.82869600 | -3.11053800 | -2.95698600 |
| O | 0.67713600  | -2.70830700 | -1.66532200 |
| C | -4.51203600 | 0.06114800  | 0.36036600  |
| C | 1.38230300  | -1.66625800 | -1.03027500 |
| H | 1.91398700  | -1.06693200 | -1.79290300 |
| C | -5.16173900 | 1.19548200  | -0.41666500 |
| H | -5.54791500 | 1.94825600  | 0.27840200  |
| H | -4.41714300 | 1.65480000  | -1.06745900 |
| H | -5.99556000 | 0.81033900  | -1.01301200 |
| C | -5.46060000 | -0.58818000 | 1.37062000  |
| H | -5.76157100 | 0.14422200  | 2.12652400  |
| H | -6.35707700 | -0.95978400 | 0.86414600  |
| H | -4.97356300 | -1.42551800 | 1.87974000  |
| H | 0.06810800  | 0.45554400  | -1.92843700 |
| O | -2.11184400 | 1.50610200  | -1.24165600 |
| C | 2.06637800  | 2.54780600  | 0.39110700  |
| C | 3.27186500  | 1.87188100  | 0.11502000  |
| C | 1.87154300  | 3.82706600  | -0.16996100 |
| C | 4.25702500  | 2.46011700  | -0.67408200 |
| H | 3.42966300  | 0.88013400  | 0.53079500  |
| C | 2.85326600  | 4.40737900  | -0.96414500 |
| H | 0.93686000  | 4.35328500  | -0.00611500 |
| C | 4.05199500  | 3.73041400  | -1.21569400 |
| H | 5.18353900  | 1.92683200  | -0.86900600 |
| H | 2.68406000  | 5.39012100  | -1.39543700 |
| H | 4.81711100  | 4.19016600  | -1.83521800 |
| C | -0.83045600 | 1.84859500  | 2.92127200  |
| H | -1.90268300 | 1.86165200  | 2.70158100  |
| H | -0.52187100 | 0.81930300  | 3.12768100  |
| H | -0.66902100 | 2.43808700  | 3.83409200  |
| C | 2.34549400  | -2.27381300 | -0.04329400 |
| C | 3.71869200  | -2.04036100 | -0.14421500 |
| C | 1.85508500  | -3.08132700 | 0.99004200  |

|   |            |             |             |
|---|------------|-------------|-------------|
| C | 4.60007500 | -2.60272400 | 0.78314800  |
| H | 4.10140200 | -1.42336400 | -0.95423400 |
| C | 2.73340700 | -3.64261600 | 1.91457000  |
| H | 0.78728900 | -3.26595600 | 1.05167700  |
| C | 4.10746900 | -3.40300200 | 1.81398300  |
| H | 5.66769300 | -2.41920600 | 0.69638700  |
| H | 2.34881900 | -4.27081200 | 2.71372500  |
| H | 4.79081600 | -3.84289800 | 2.53558900  |

**2-TS-SS-c**

B3LYP/6-31g(d),

el. energy = -1495.906903 a.u.

im. frequency -387.76

|   |             |             |             |
|---|-------------|-------------|-------------|
| C | -1.83508300 | -1.51265000 | 0.90788700  |
| C | -0.58188500 | -0.68737000 | 1.22094300  |
| C | 0.24280800  | -0.33677900 | -0.04948900 |
| O | -0.80412500 | 0.40943600  | 2.12581700  |
| C | -2.36165000 | 1.61739300  | 2.08091800  |
| C | -1.49639500 | 2.56285300  | 1.56361800  |
| O | 0.09045100  | -1.20329500 | 2.25396600  |
| H | -2.28433600 | -1.78743100 | 1.86861500  |
| C | -0.04271700 | -1.36089500 | -1.17016800 |
| C | -1.47363900 | -2.77162200 | 0.07836200  |
| H | -1.37581900 | -3.67577200 | 0.68166400  |
| H | -0.94223900 | -1.04497300 | -1.71157200 |
| O | -0.26249800 | -2.66240200 | -0.61726800 |
| O | -2.57824300 | -2.91398900 | -0.81177500 |
| O | -2.77897300 | -0.82985100 | 0.07563300  |
| O | 1.60461000  | -0.32758300 | 0.34759500  |
| C | 1.10616500  | -1.42526500 | -2.17400200 |
| H | 1.01483800  | -0.56473900 | -2.85974800 |
| H | 1.03605100  | -2.34801000 | -2.75488000 |
| O | 2.38412800  | -1.41622600 | -1.55890600 |
| C | -3.50893000 | -1.84498000 | -0.62616700 |
| C | 2.52060300  | -0.28705800 | -0.71341800 |

|   |             |             |             |
|---|-------------|-------------|-------------|
| H | 2.33149600  | 0.62000100  | -1.32427300 |
| C | -3.93549400 | -1.29837000 | -1.98110000 |
| H | -4.62437600 | -0.45719600 | -1.85325200 |
| H | -3.06255300 | -0.96241900 | -2.54664600 |
| H | -4.44399900 | -2.07940700 | -2.55373000 |
| C | -4.69933500 | -2.33306900 | 0.20588400  |
| H | -5.41928600 | -1.52262600 | 0.35994800  |
| H | -5.20170400 | -3.15704500 | -0.30991800 |
| H | -4.36838500 | -2.69709400 | 1.18316600  |
| H | -0.04451100 | 0.66004500  | -0.41322300 |
| H | -0.86780100 | 3.08945400  | 2.27982200  |
| H | -3.02402800 | 1.08157400  | 1.40777300  |
| C | -1.32539400 | 2.96107600  | 0.17771700  |
| C | -0.32194700 | 3.90349700  | -0.13095900 |
| C | -2.13183500 | 2.47597700  | -0.87583000 |
| C | -0.12812600 | 4.34580100  | -1.43619000 |
| H | 0.30908400  | 4.28316500  | 0.66860700  |
| C | -1.93420100 | 2.91945300  | -2.17865800 |
| H | -2.90080000 | 1.73887700  | -0.67209600 |
| C | -0.93487600 | 3.85615500  | -2.46564500 |
| H | 0.65161700  | 5.07104400  | -1.65088400 |
| H | -2.56374200 | 2.53659600  | -2.97735000 |
| H | -0.78808200 | 4.20119900  | -3.48533500 |
| C | -2.70817900 | 1.55733000  | 3.53977600  |
| H | -1.90942100 | 1.97920600  | 4.15687700  |
| H | -3.62908800 | 2.12537600  | 3.73130200  |
| H | -2.87758000 | 0.52425400  | 3.85532500  |
| C | 3.92597800  | -0.26986200 | -0.15443100 |
| C | 5.00717800  | -0.18545100 | -1.03863800 |
| C | 4.16028000  | -0.33400000 | 1.22156500  |
| C | 6.31341200  | -0.16152500 | -0.55249900 |
| H | 4.82249900  | -0.15066600 | -2.10924400 |
| C | 5.46988500  | -0.30920800 | 1.70610600  |
| H | 3.31544200  | -0.40928900 | 1.89707200  |
| C | 6.54731700  | -0.22161300 | 0.82367900  |

|   |            |             |             |
|---|------------|-------------|-------------|
| H | 7.14806200 | -0.09782800 | -1.24598600 |
| H | 5.64689100 | -0.36188400 | 2.77732500  |
| H | 7.56533500 | -0.20203700 | 1.20455800  |

## 2-TS-RR-a

B3LYP/6-31g(d),

el. energy = -1495.908969 a.u.

im. frequency -345.73

|   |             |             |             |
|---|-------------|-------------|-------------|
| C | 1.46122700  | -0.63853400 | -0.32998100 |
| C | 0.94078500  | -0.91631700 | 1.10282200  |
| C | -0.45029100 | -1.55507500 | 1.06482200  |
| O | 1.10463400  | 0.17963300  | 2.01330800  |
| C | 0.00042000  | 2.13901400  | 1.09475600  |
| C | 0.10509800  | 1.71077800  | 2.41135100  |
| H | 0.91923200  | 2.11338500  | 3.00734500  |
| H | -0.90191100 | 1.85150900  | 0.55805700  |
| C | 0.97482900  | 2.89602500  | 0.34236400  |
| C | 0.58426300  | 3.44246700  | -0.90005200 |
| C | 2.29560300  | 3.12109300  | 0.79176000  |
| C | 1.46456500  | 4.21887200  | -1.64673900 |
| H | -0.42449900 | 3.26106000  | -1.26284500 |
| C | 3.17339100  | 3.88757700  | 0.03750100  |
| H | 2.63749400  | 2.65187600  | 1.70799000  |
| C | 2.76065100  | 4.44640700  | -1.17835500 |
| H | 1.14440800  | 4.64070700  | -2.59520600 |
| H | 4.18980300  | 4.04224100  | 0.38797000  |
| H | 3.45315700  | 5.04538300  | -1.76327200 |
| C | -1.07910100 | 1.22903800  | 3.19977000  |
| H | -1.82970900 | 0.77735300  | 2.54761400  |
| H | -0.76029000 | 0.49533100  | 3.94557700  |
| H | -1.53969400 | 2.07210800  | 3.73226900  |
| H | 0.98463600  | 0.25722100  | -0.73548100 |
| C | -0.36760800 | -2.85274400 | 0.24682900  |
| C | 1.23575000  | -1.84972600 | -1.26057500 |
| H | 1.20577200  | -1.53543300 | -2.31243400 |

|   |             |             |             |                                |             |             |             |
|---|-------------|-------------|-------------|--------------------------------|-------------|-------------|-------------|
| H | 0.30555300  | -3.55895100 | 0.74906800  | B3LYP/6-31g(d),                |             |             |             |
| O | 0.07351200  | -2.59051400 | -1.08808700 | el. energy = -1495.909769 a.u. |             |             |             |
| O | 2.40268400  | -2.62766800 | -1.01349700 | im. frequency -377.47          |             |             |             |
| O | 2.86420100  | -0.46906700 | -0.37220200 | C                              | -2.22978400 | -0.08600700 | 0.59957100  |
| O | -1.41986100 | -0.68132600 | 0.47359800  | C                              | -1.53194400 | 0.68093800  | -0.54330700 |
| C | -1.76888100 | -3.43699800 | 0.11191100  | C                              | -0.50960800 | -0.21936800 | -1.23386200 |
| H | -2.10513800 | -3.81142100 | 1.09273500  | O                              | -1.09763700 | 2.01496900  | -0.23450000 |
| H | -1.77902200 | -4.25945400 | -0.60655600 | C                              | -0.10677500 | 2.31889900  | 1.48864600  |
| O | -2.68239600 | -2.46133300 | -0.38781200 | C                              | 0.70725000  | 3.15386800  | 0.74935200  |
| C | 3.47620600  | -1.71085600 | -0.79936500 | H                              | 0.32022900  | 4.15740900  | 0.57457000  |
| C | -2.70764700 | -1.29148800 | 0.39295300  | H                              | 0.24182800  | 1.31012100  | 1.69758400  |
| H | -3.02958000 | -1.54525800 | 1.42100100  | H                              | -1.54650900 | -0.20682500 | 1.44547400  |
| C | 4.38714200  | -2.26050800 | 0.28809200  | C                              | -1.26883900 | -1.41502500 | -1.83032300 |
| H | 5.21411300  | -1.56501700 | 0.46515200  | C                              | -2.73811700 | -1.45937400 | 0.10545100  |
| H | 3.81376800  | -2.37662700 | 1.20819600  | H                              | -2.85627600 | -2.15683200 | 0.94533500  |
| H | 4.80206600  | -3.22540100 | -0.02231500 | H                              | -1.96795900 | -1.05618000 | -2.59623500 |
| C | 4.21775900  | -1.43684000 | -2.11065400 | O                              | -1.96015400 | -2.14825500 | -0.81266100 |
| H | 4.97829800  | -0.66488100 | -1.95560200 | O                              | -4.01501800 | -1.11413400 | -0.42587300 |
| H | 4.70787200  | -2.34794300 | -2.46876500 | O                              | -3.41302600 | 0.54481000  | 1.04502800  |
| H | 3.52549700  | -1.08459600 | -2.88165100 | O                              | 0.47878500  | -0.69059900 | -0.31047000 |
| H | -0.73225300 | -1.79087100 | 2.10153800  | C                              | -0.25788000 | -2.38919700 | -2.42158000 |
| O | 1.76312000  | -1.59368400 | 1.91670100  | H                              | 0.20424000  | -1.93834600 | -3.31545400 |
| C | -3.64710100 | -0.30133700 | -0.24562200 | H                              | -0.73957600 | -3.32800900 | -2.70373200 |
| C | -4.67818300 | 0.28609000  | 0.48985000  | O                              | 0.73667800  | -2.72559000 | -1.45713300 |
| C | -3.46676000 | 0.05006300  | -1.58928600 | C                              | -4.55541800 | -0.09589800 | 0.41306100  |
| C | -5.52645600 | 1.22137600  | -0.10822300 | C                              | 1.39092500  | -1.59238600 | -0.92944300 |
| H | -4.82346300 | 0.00894300  | 1.53167600  | H                              | 1.90080500  | -1.05383000 | -1.74989400 |
| C | -4.31306400 | 0.98221900  | -2.18615600 | C                              | -5.31636700 | 0.90356900  | -0.44381000 |
| H | -2.66852400 | -0.42207400 | -2.15328000 | H                              | -5.73261300 | 1.69401700  | 0.18918300  |
| C | -5.34387100 | 1.57047900  | -1.44630900 | H                              | -4.63322800 | 1.34567800  | -1.16942000 |
| H | -6.32899500 | 1.67191900  | 0.46958000  | H                              | -6.13985000 | 0.40075200  | -0.96174500 |
| H | -4.17369600 | 1.24855800  | -3.23066800 | C                              | -5.41640700 | -0.70581200 | 1.52174500  |
| H | -6.00440500 | 2.29556300  | -1.91455900 | H                              | -5.74653200 | 0.07638600  | 2.21275500  |
|   |             |             |             | H                              | -6.29854700 | -1.19151700 | 1.09255600  |
|   |             |             |             | H                              | -4.84993200 | -1.44904500 | 2.09122400  |

2-TS-RR-b

|   |             |             |             |   |             |             |             |
|---|-------------|-------------|-------------|---|-------------|-------------|-------------|
| H | -0.03684800 | 0.36253300  | -2.03785500 | C | -0.55837700 | -0.85485800 | -0.27865200 |
| O | -2.32331000 | 1.30387100  | -1.42669100 | O | -0.73603600 | 0.38617200  | 1.90485600  |
| C | 2.00160200  | 2.89015600  | 0.15593100  | C | -0.92006300 | 2.29003400  | 1.97284800  |
| C | 2.58047100  | 3.89683200  | -0.64697800 | C | -0.67218100 | 2.52383500  | 0.62966000  |
| C | 2.73746000  | 1.70638900  | 0.37932400  | O | -0.94248000 | -1.47432000 | 2.07231000  |
| C | 3.84205100  | 3.73119000  | -1.20835400 | H | -1.54290100 | 2.60483600  | -0.01778600 |
| H | 2.02357700  | 4.81313200  | -0.82622500 | H | -0.07939500 | 2.35176800  | 2.65800800  |
| C | 3.99966000  | 1.54582900  | -0.18020300 | H | -3.29474000 | -0.57342800 | 1.77340300  |
| H | 2.31837900  | 0.91061200  | 0.98433100  | C | -0.94991600 | -2.25664300 | -0.81967300 |
| C | 4.55738600  | 2.55459500  | -0.97394900 | C | -3.22960000 | -1.76217700 | -0.09411800 |
| H | 4.26859600  | 4.51761300  | -1.82461200 | H | -4.02838000 | -2.34810200 | 0.37210800  |
| H | 4.55164800  | 0.62992500  | 0.00756600  | H | -0.92851600 | -2.23349900 | -1.91544500 |
| H | 5.54666500  | 2.42379100  | -1.40414200 | O | -2.24707200 | -2.69861900 | -0.38151500 |
| C | -1.22802800 | 2.83997800  | 2.34184500  | O | -3.70738300 | -1.13889100 | -1.28606300 |
| H | -0.89483500 | 2.92732200  | 3.38575900  | O | -3.14033200 | 0.60046500  | 0.05039600  |
| H | -1.54891300 | 3.82945300  | 2.00209300  | O | 0.85253600  | -0.67580200 | -0.26370700 |
| H | -2.09488700 | 2.17497800  | 2.31371000  | C | 0.01068700  | -3.33738200 | -0.30066200 |
| C | 2.38010200  | -2.07526200 | 0.10237600  | H | -0.21851700 | -3.52667800 | 0.75612800  |
| C | 3.74113500  | -2.15280000 | -0.20425300 | O | 1.36697500  | -2.93673400 | -0.45646700 |
| C | 1.93119500  | -2.50263800 | 1.35720500  | C | -4.05367300 | 0.20286000  | -0.98509500 |
| C | 4.65088900  | -2.64150500 | 0.73643000  | C | 1.61217200  | -1.75293400 | 0.27794600  |
| H | 4.08961700  | -1.83716200 | -1.18498100 | C | -3.80590700 | 1.06210100  | -2.21531500 |
| C | 2.83890500  | -2.98645000 | 2.29833500  | H | -3.99986200 | 2.11496200  | -1.98750700 |
| H | 0.87083000  | -2.45457500 | 1.58246100  | H | -2.76962100 | 0.94897400  | -2.54468000 |
| C | 4.20041600  | -3.05562400 | 1.99065600  | H | -4.46893500 | 0.75421900  | -3.02919900 |
| H | 5.70732000  | -2.70103900 | 0.48842500  | C | -5.49764500 | 0.29794100  | -0.47855700 |
| H | 2.48433700  | -3.31549900 | 3.27154900  | H | -5.74683100 | 1.33443600  | -0.22957100 |
| H | 4.90621000  | -3.43480400 | 2.72492400  | H | -6.19224600 | -0.05795300 | -1.24587500 |
|   |             |             |             | H | -5.63663200 | -0.31236200 | 0.41969900  |
|   |             |             |             | H | -0.91709400 | -0.08913800 | -0.97122300 |
|   |             |             |             | H | -0.11726500 | -4.26476300 | -0.86527700 |
|   |             |             |             | H | 1.32733400  | -1.90463200 | 1.32619900  |
|   |             |             |             | C | 0.61161200  | 2.65986000  | -0.01731300 |
|   |             |             |             | C | 0.64568400  | 3.15169500  | -1.34047700 |
|   |             |             |             | C | 1.83418400  | 2.33382700  | 0.61065900  |

**2-TS-RR-c**

B3LYP/6-31g(d),

el. energy = -1495.906387 a.u.

im. frequency -315.88

|   |             |             |            |
|---|-------------|-------------|------------|
| C | -2.78332400 | -0.56223800 | 0.80474000 |
| C | -1.26846800 | -0.63582300 | 1.06816200 |

|   |             |             |             |
|---|-------------|-------------|-------------|
| C | 1.85484100  | 3.34650100  | -1.99910400 |
| H | -0.29009400 | 3.39295300  | -1.83903700 |
| C | 3.03796300  | 2.51328800  | -0.05551600 |
| H | 1.82628500  | 1.88863700  | 1.59944900  |
| C | 3.05410500  | 3.02782700  | -1.35759100 |
| H | 1.86377800  | 3.73581900  | -3.01329100 |
| H | 3.96763300  | 2.22593900  | 0.42597000  |
| H | 4.00005700  | 3.16348900  | -1.87447600 |
| C | -2.27140500 | 2.49801300  | 2.59578500  |
| H | -3.07225500 | 2.30395200  | 1.87834300  |
| H | -2.39469900 | 1.83342100  | 3.45553000  |
| H | -2.36244000 | 3.53226900  | 2.95527700  |
| C | 3.06953100  | -1.38915100 | 0.14654100  |
| C | 3.84729100  | -1.16888700 | 1.28511400  |
| C | 3.64915000  | -1.25455600 | -1.12030600 |
| C | 5.19374300  | -0.81429200 | 1.16435600  |
| H | 3.39869400  | -1.27785400 | 2.26978900  |
| C | 4.99206900  | -0.90381000 | -1.24319200 |
| H | 3.03925200  | -1.43093000 | -2.00041000 |
| C | 5.76759500  | -0.68108400 | -0.10074900 |
| H | 5.79298300  | -0.65037600 | 2.05635700  |
| H | 5.43799600  | -0.80617900 | -2.22983000 |
| H | 6.81632900  | -0.41160500 | -0.19807900 |



## References

- 1 Frisch, M.J.; Trucks, G. W.; Schlegel, H. B.; Scuseria, G. E.; Robb, M. A.; Cheeseman, J. R.; Scalmani, G.; Barone, V.; Petersson, G. A.; Nakatsuji, H.; Li, X.; Caricato, M.; Marenich, A. V.; Bloino, J.; Janesko, B. G.; Gomperts, R.; Mennucci, B.; Hratchian, H. P.; Ortiz, J. V.; Izmaylov, A. F.; Sonnenberg, J. L.; Williams-Young, D.; Ding, F.; Lipparini, F.; Egidi, F.; Goings, J.; Peng, B.; Petrone, A.; Henderson, T.; Ranasinghe, D.; Zakrzewski, V. G.; Gao, J.; Rega, N.; Zheng, G.; Liang, W.; Hada, M.; Ehara, M.; Toyota, K.; Fukuda, R.; Hasegawa, J.; Ishida, M.; Nakajima, T.; Honda, Y.; Kitao, O.; Nakai, H.; Vreven, T.; Throssell, K.; Montgomery, Jr. J. A.; Peralta, J. E.; Ogliaro, F.; Bearpark, M. J.; Heyd, J. J.; Brothers, E. N.; Kudin, K. N.; Staroverov, V. N.; Keith, T. A.; Kobayashi, R.; Normand, J.; Raghavachari, K.; Rendell, A. P.; Burant, J. C.; Iyengar, S. S.; Tomasi, J.; Cossi, M.; Millam, J. M.; Klene, M.; Adamo, C.; Cammi, R.; Ochterski, J. W.; Martin, R. L.; Morokuma, K.; Farkas, O.; Foresman, J. B.; Fox, D. J. Gaussian16, Revision C.01; Gaussian, Inc., Wallingford, CT, 2016.
- 2 A. D. Becke, *J Chem Phys*, 1993, **98**, 5648–5652.
- 3 C. Lee, W. Yang and R. G. Parr, *Phys Rev B*, 1988, **37**, 785–789.
- 4 S. Grimme, C. Bannwarth, S. Dohm, A. Hansen, J. Pisarek, P. Pracht, J. Seibert and F. Neese, *Angewandte Chemie International Edition*, 2017, **56**, 14763–14769.
- 5 C. Bannwarth, S. Ehlert and S. Grimme, *J Chem Theory Comput*, 2019, **15**, 1652–1671.
- 6 P. Pracht, F. Bohle and S. Grimme, *Physical Chemistry Chemical Physics*, 2020, **22**, 7169–7192.
- 7 W. J. Hehre, R. Ditchfield and J. A. Pople, *J Chem Phys*, 1972, **56**, 2257–2261.
- 8 W. J. Hehre, R. Ditchfield and J. A. Pople, *J Chem Phys*, 1972, **56**, 2257–2261.
- 9 P. C. Hariharan and J. A. Pople, *Theor Chim Acta*, 1973, **28**, 213–222.
- 10 D. A. Singleton, Z. Wang, *J Am Chem Soc* **2005**, *127*, 6679–6685.
- 11 D. Imperio, E. Casali, E. Del Grosso, D. Caprioglio, A. Minassi, L. Panza, *Eur. J. Org. Chem.* **2024**, *27*, e202301163.
- 12 Y. Zhao, D. G. Truhlar, *Theor Chem Acc* **2008**, *120*, 215–241.
- 13 F. Weigend and R. Ahlrichs, *Physical Chemistry Chemical Physics*, 2005, **7**, 3297.
- 14 A. V. Marenich, C. J. Cramer and D. G. Truhlar, *J Phys Chem B*, 2009, **113**, 6378–6396.
- 15 R. C. Weast, *CRC Handbook of Chemistry and Physics*, 76th ed, FL, 76th edn., 1995.
- 16 D. M. D. J. G. C. J. C. and D. G. T. Paul Winget, Minnesota Solvent Descriptor Database.

Fig. S3 <sup>1</sup>H Compound 3 CDCl<sub>3</sub> 400 MHz

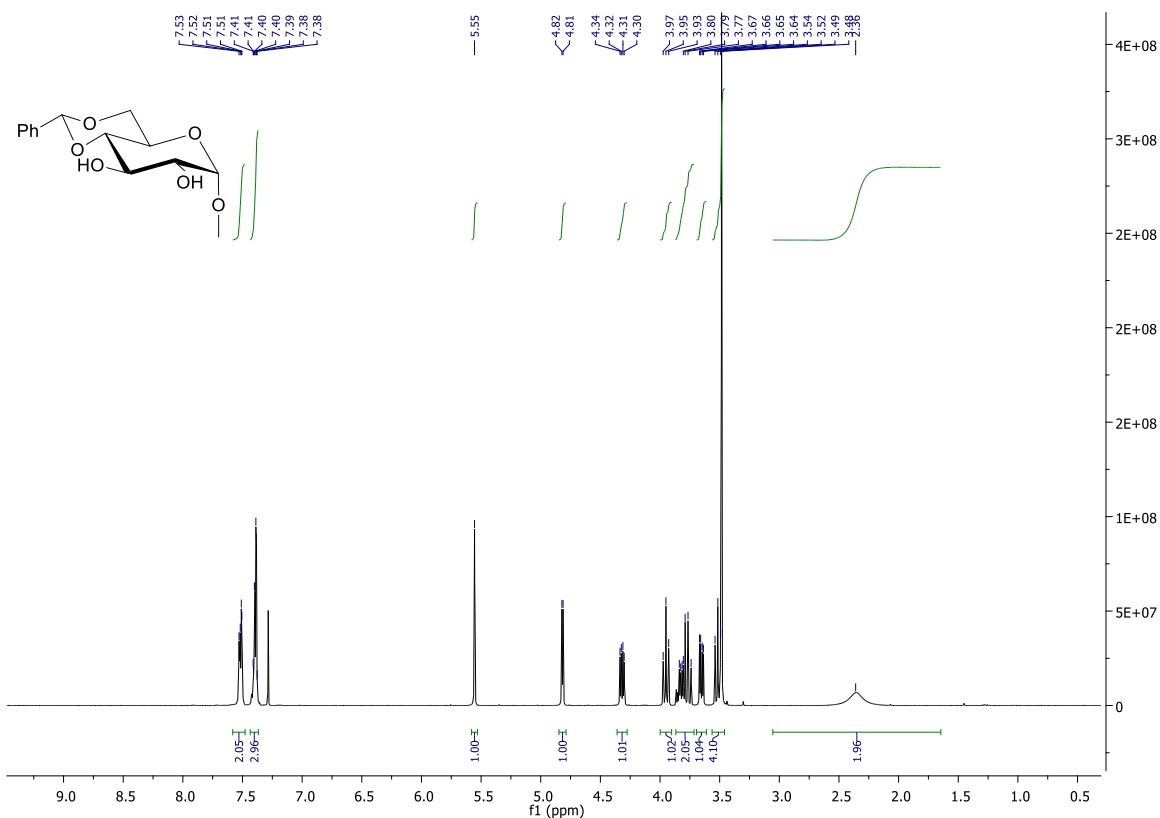

Fig. S4 <sup>1</sup>H Compound 4 CDCl<sub>3</sub> 400 MHz

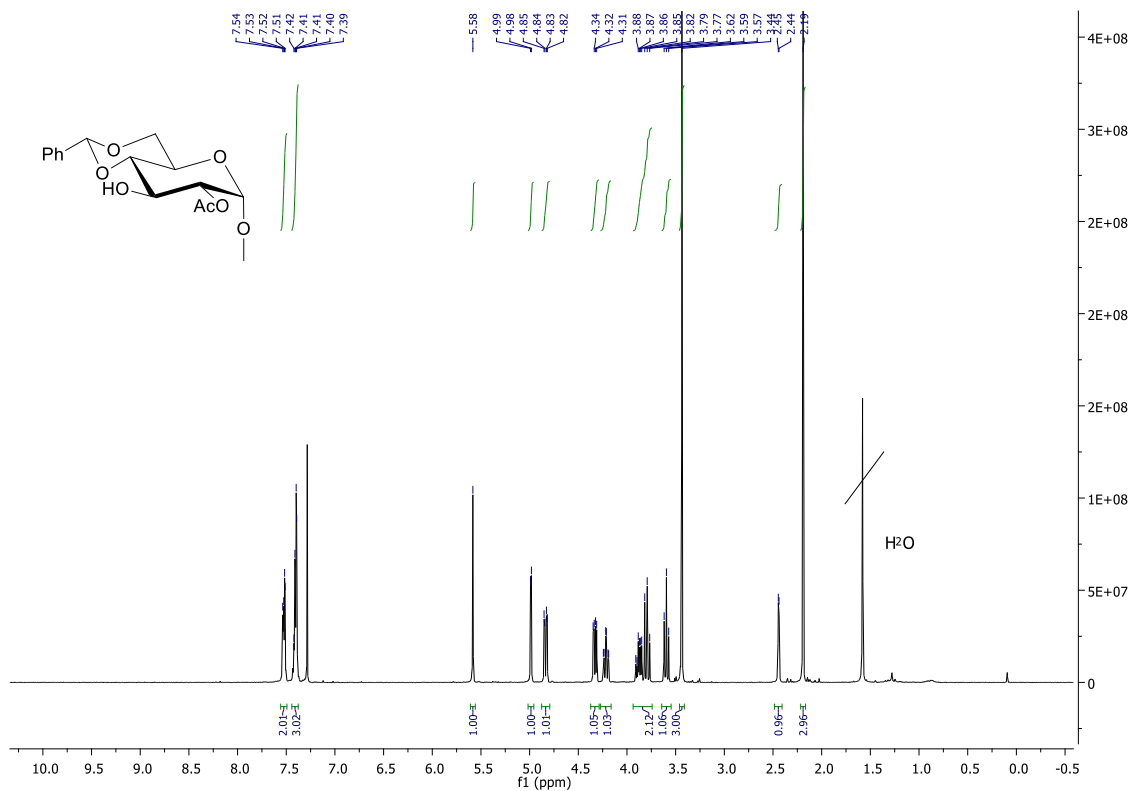

Fig. S5 <sup>1</sup>H Compound 1 CDCl<sub>3</sub> 400 MHz

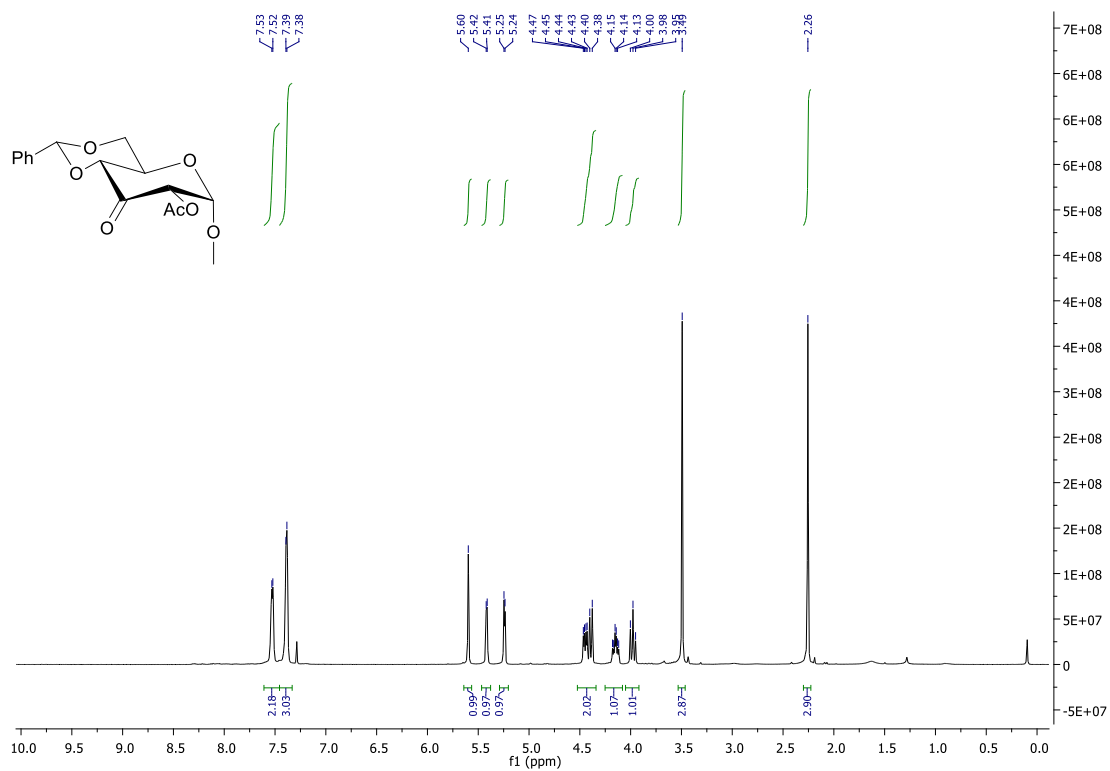

Fig. S6 COSY Compound 1 CDCl<sub>3</sub> 400 MHz

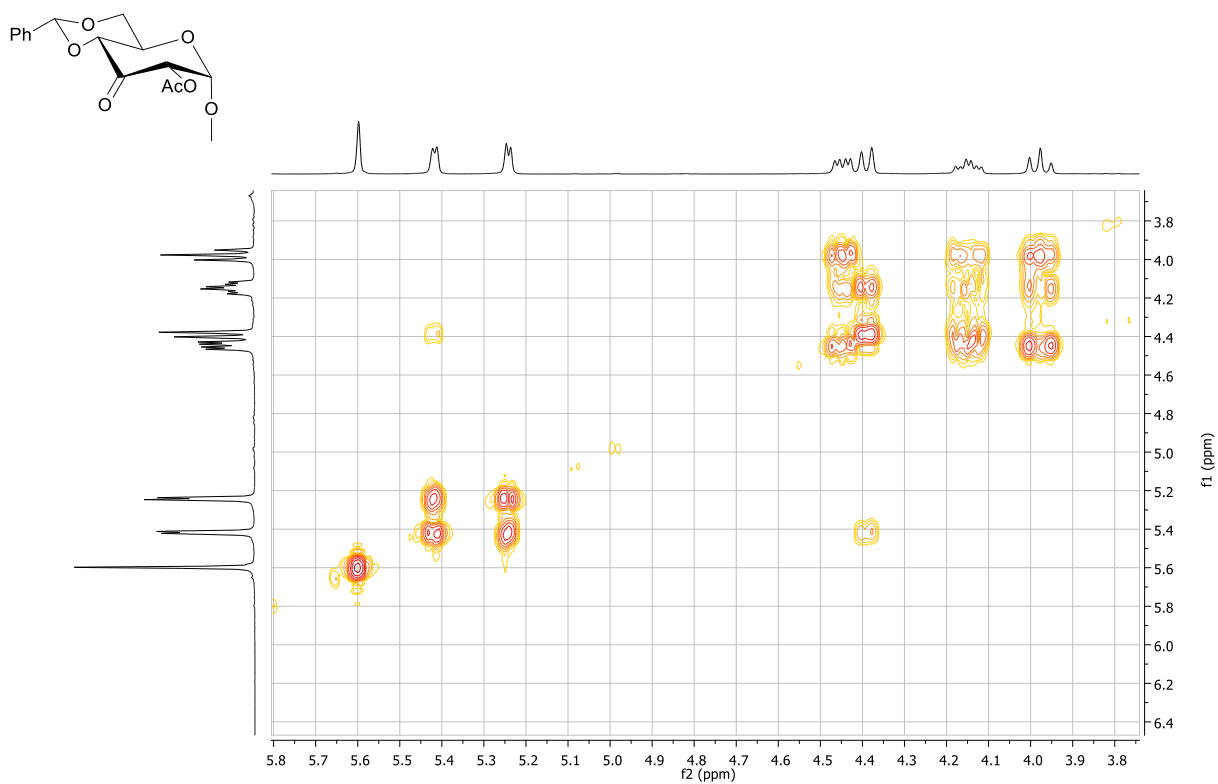

Fig. S7 <sup>13</sup>C Compound 1 CDCl<sub>3</sub> 100 MHz

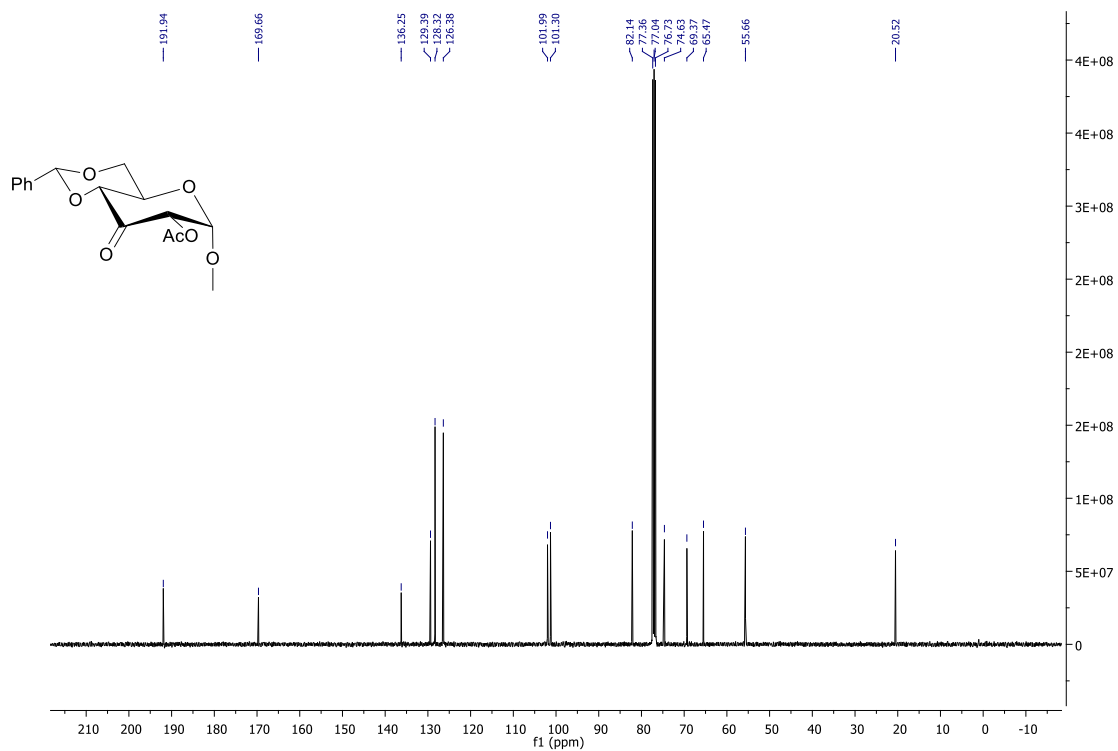

Fig. S8 HSQC Compound 1 CDCl<sub>3</sub>

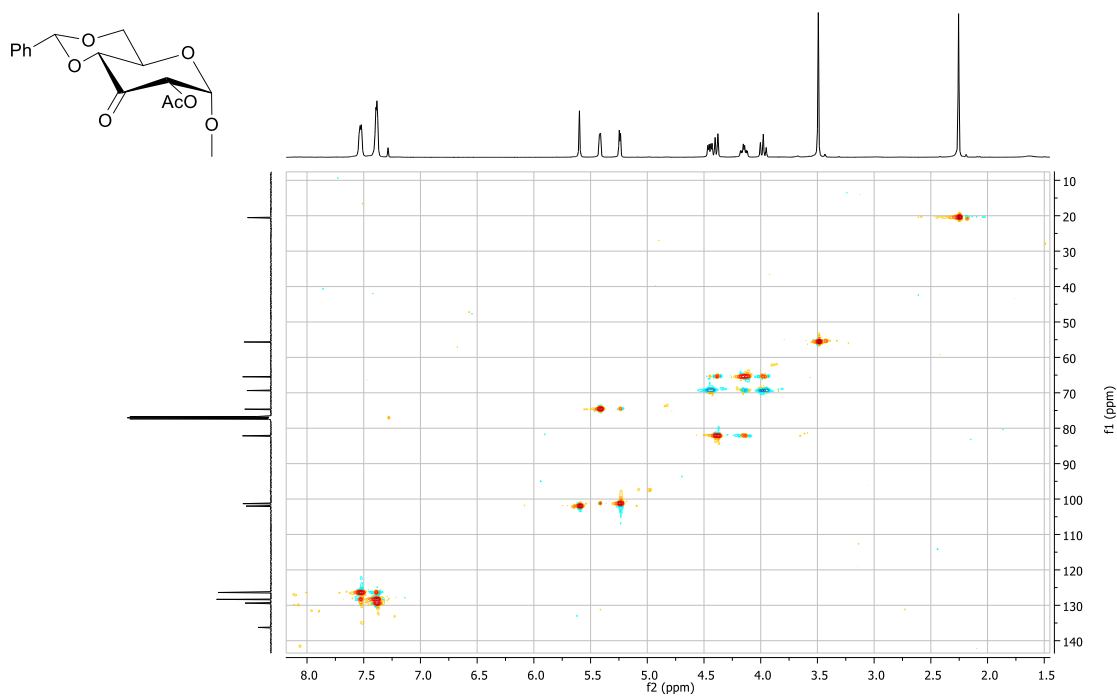

Fig. S9 <sup>1</sup>H Compound 5 CD<sub>3</sub>OD 400 MHz

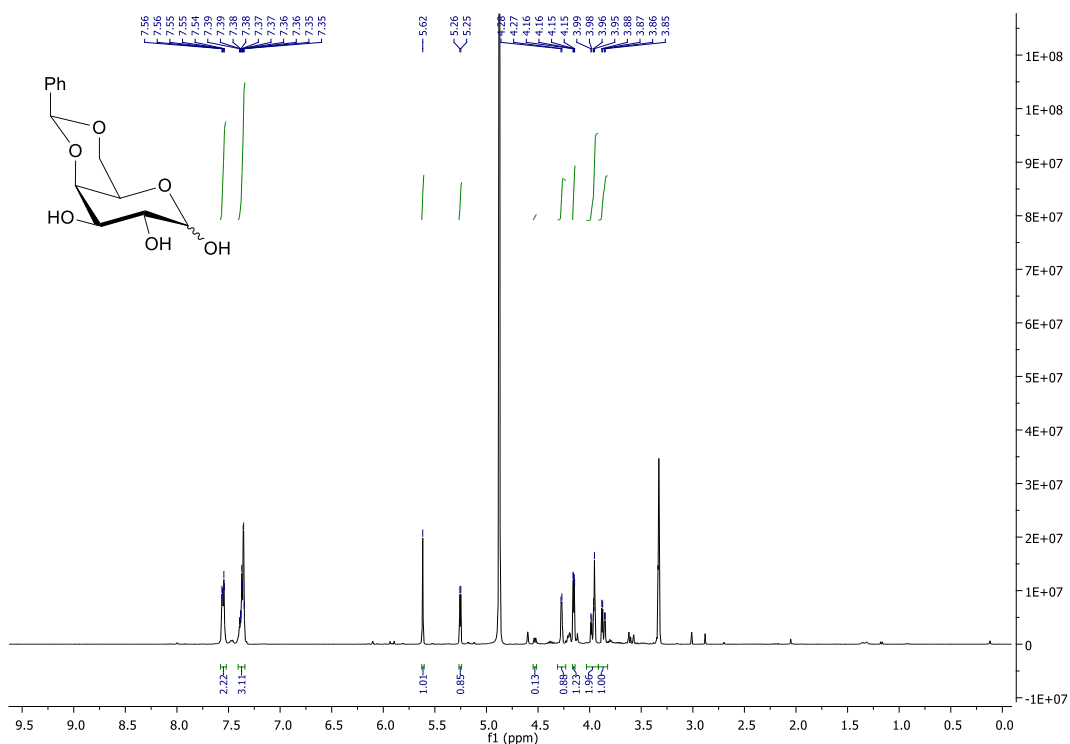

Fig. S10 <sup>1</sup>H Compound 6 CDCl<sub>3</sub> 400 MHz

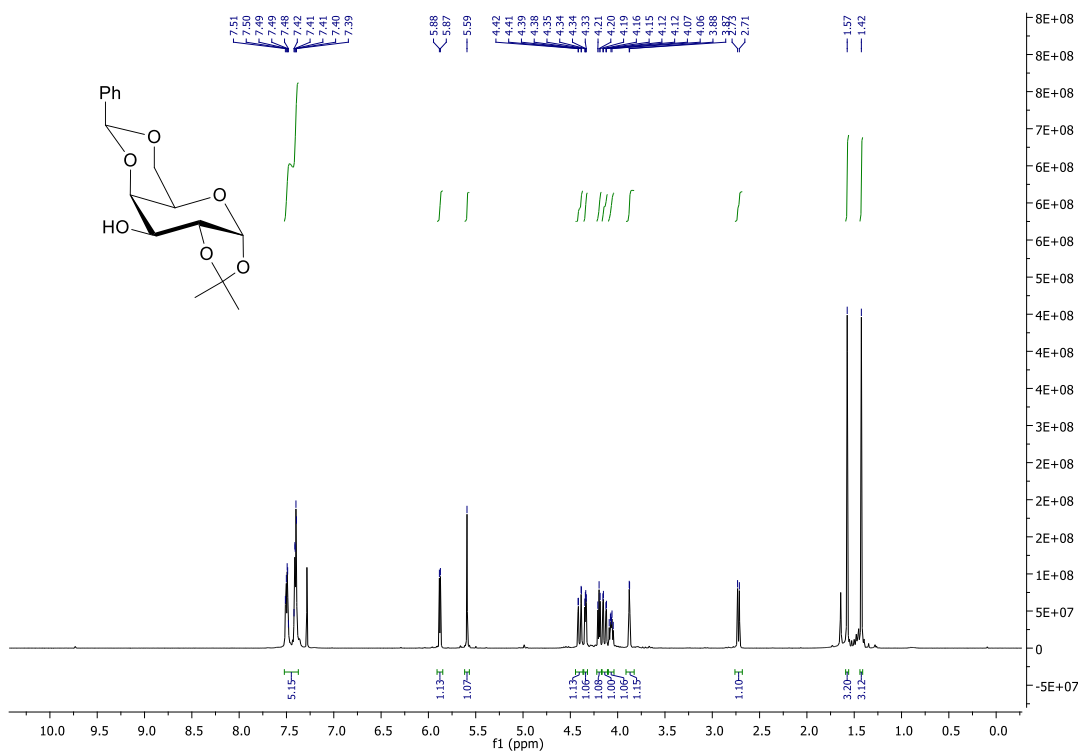

Fig. S11 <sup>1</sup>H Compound 2 CDCl<sub>3</sub> 400 MHz

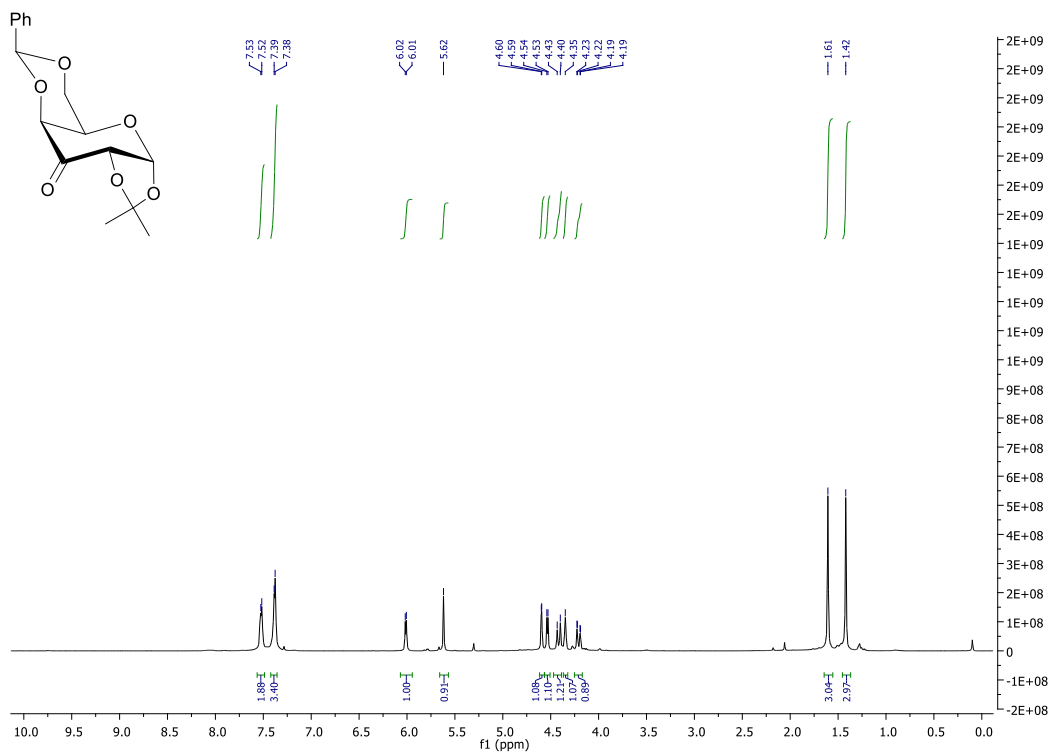

Fig. S COSY Compound 2 CDCl<sub>3</sub> 400 MHz

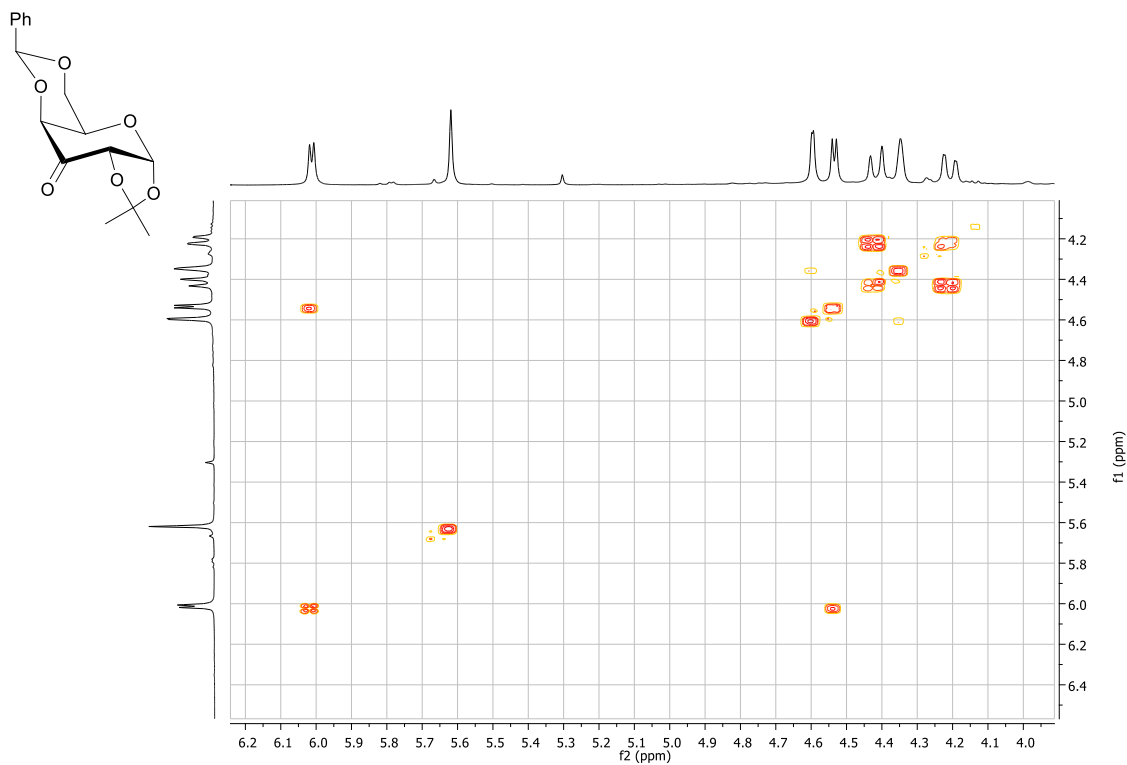

Fig. S12  $^{13}\text{C}$  Compound **2**  $\text{CDCl}_3$  100 MHz

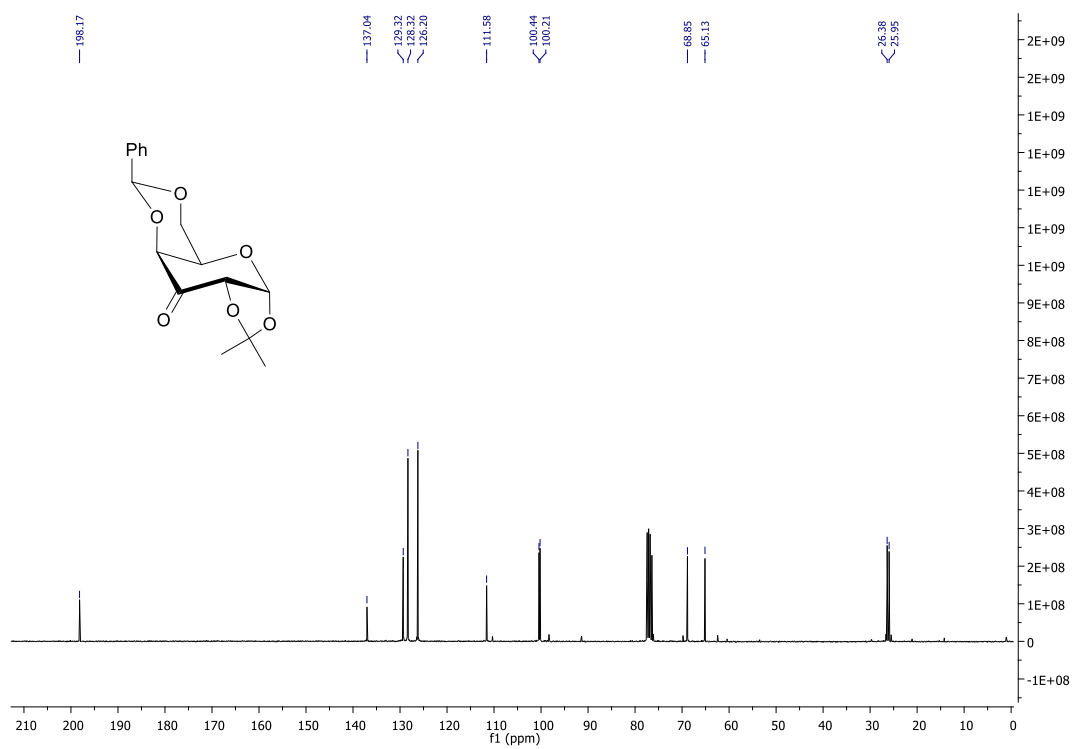

Fig. S13 HSQC Compound **2**  $\text{CDCl}_3$

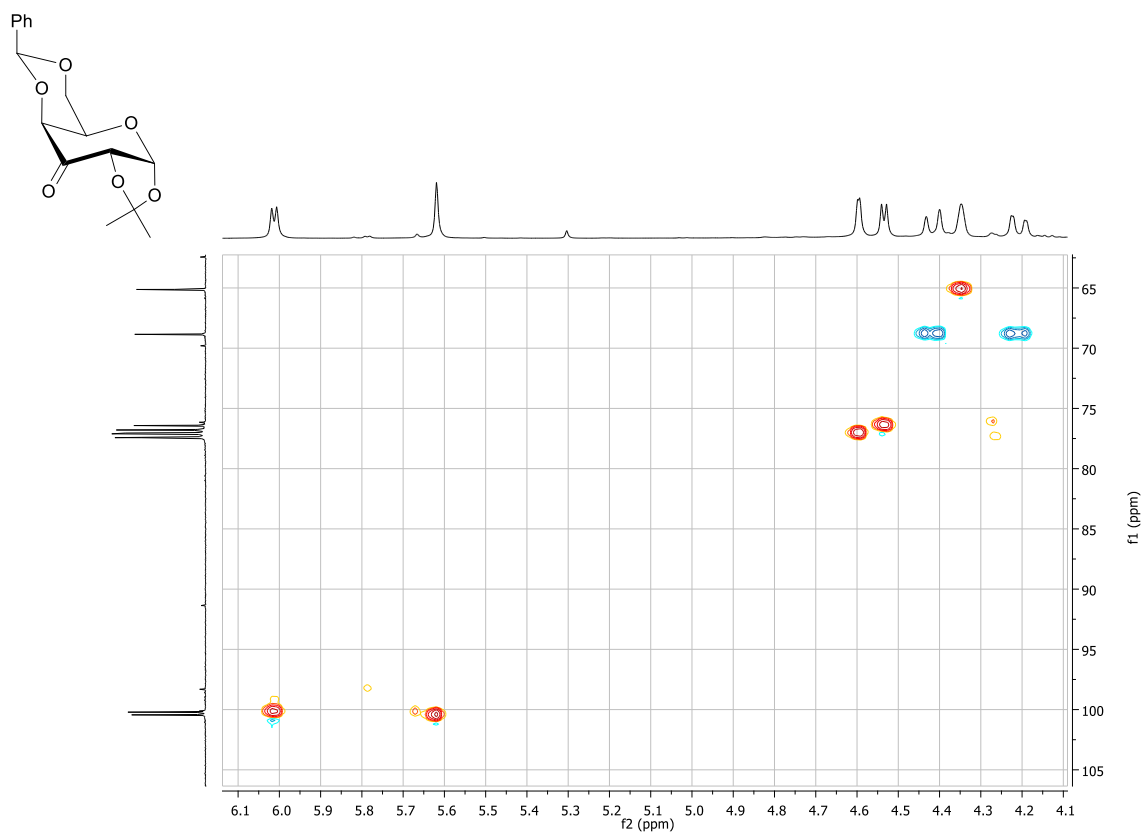

Fig. S14 <sup>1</sup>H Compound **7a** CDCl<sub>3</sub> 400 MHz

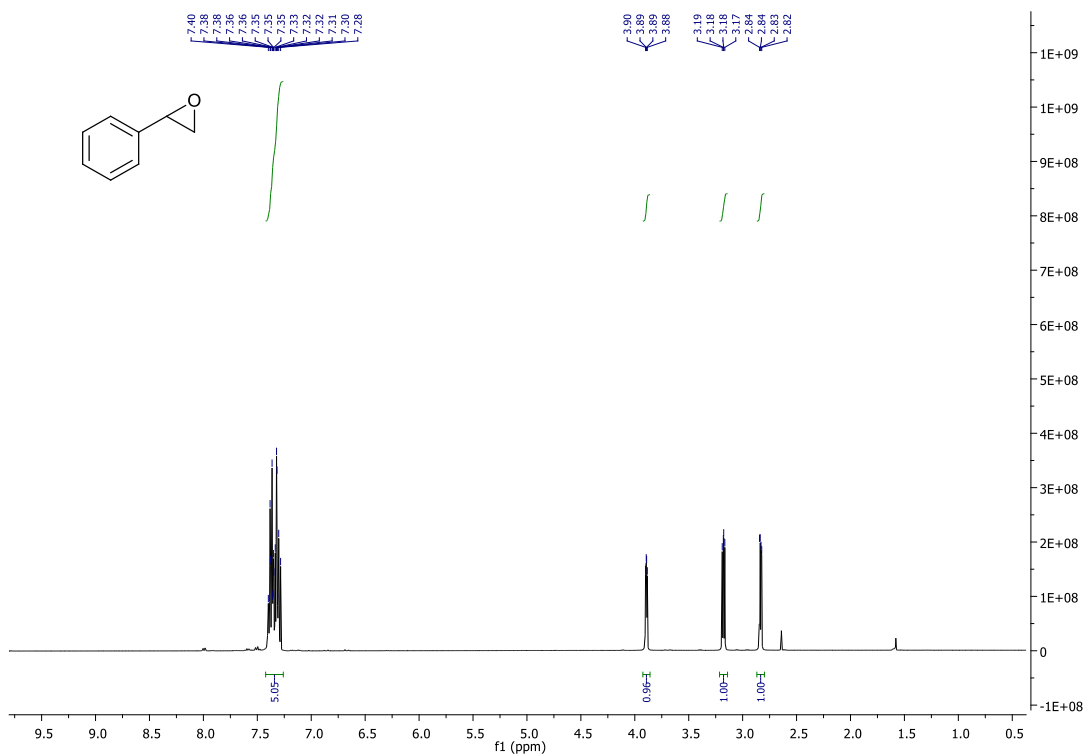

Fig. S15 <sup>1</sup>H Compound **8a** CDCl<sub>3</sub> 400 MHz

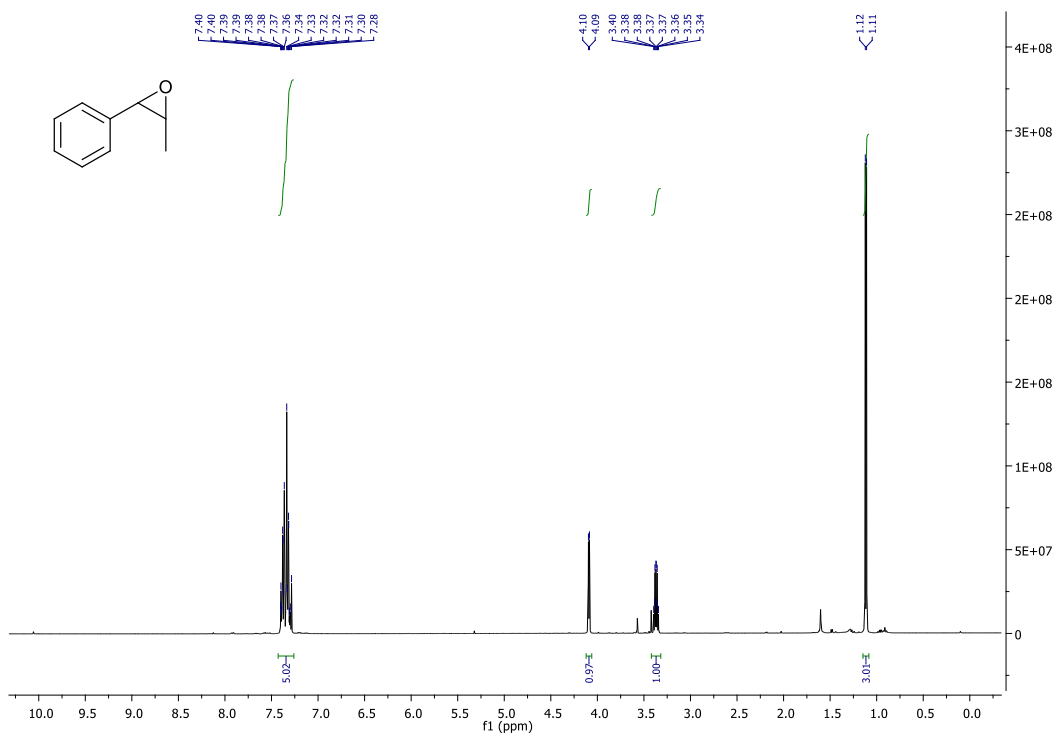



Fig. S16 <sup>1</sup>H Compound **9a** CDCl<sub>3</sub> 400 MHz

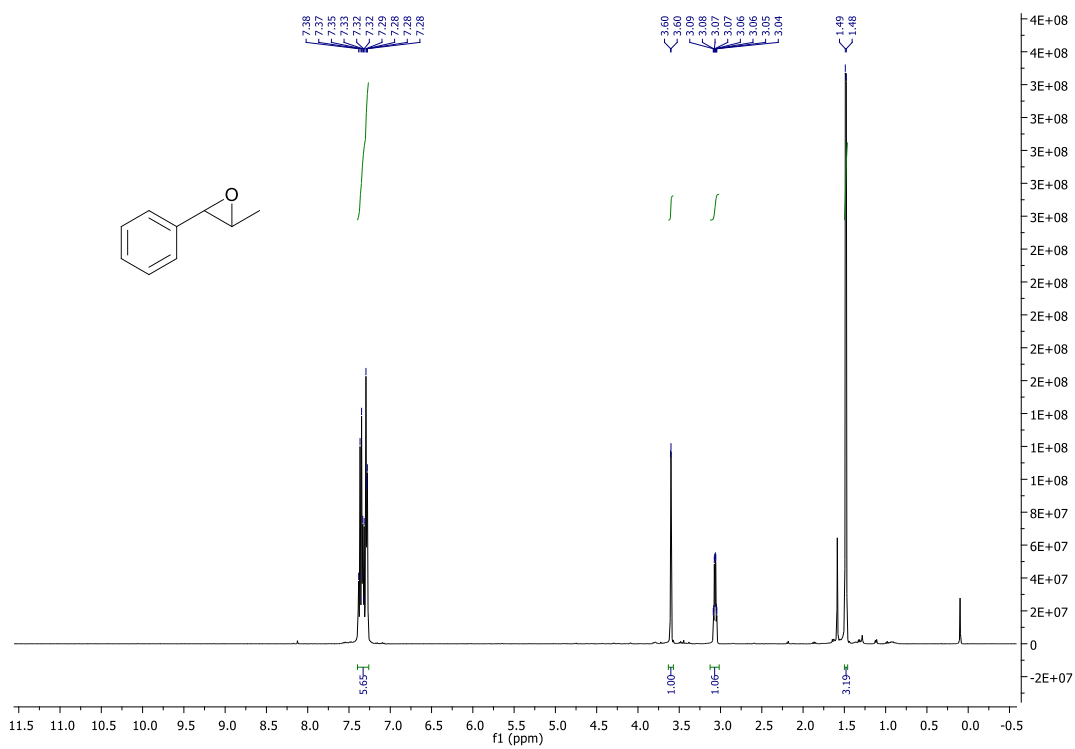

Fig. S17 <sup>1</sup>H Compound **10a** CDCl<sub>3</sub> 400 MHz

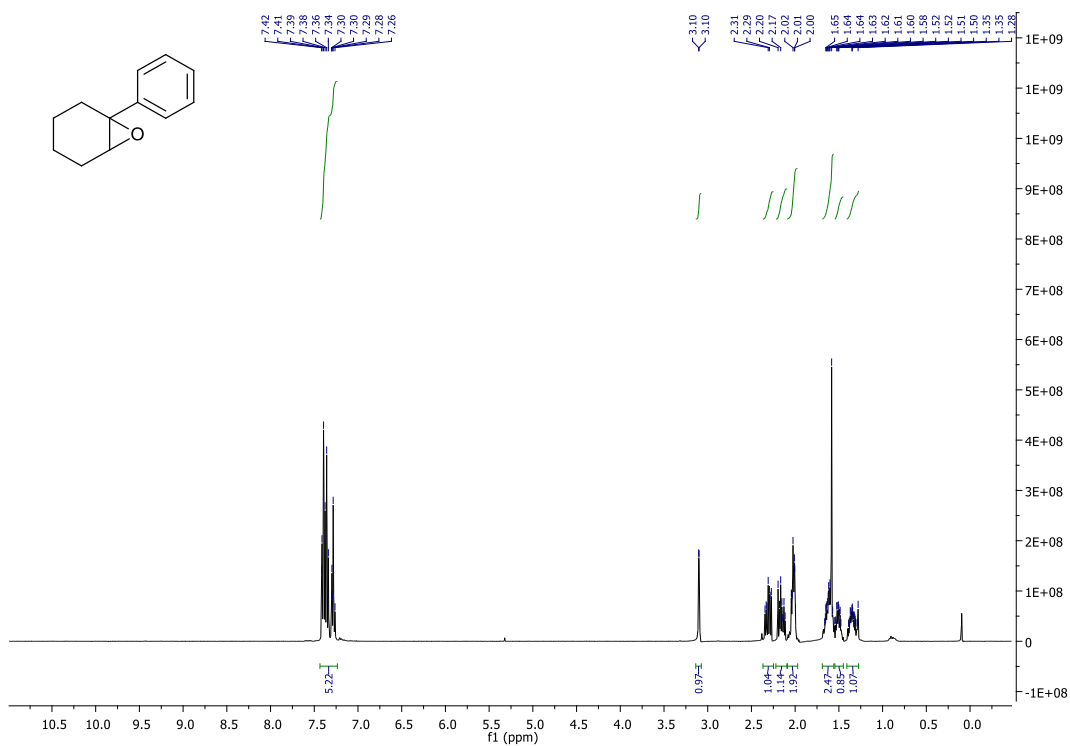

Fig. S18 <sup>1</sup>H Compound **11a** CDCl<sub>3</sub> 400 MHz

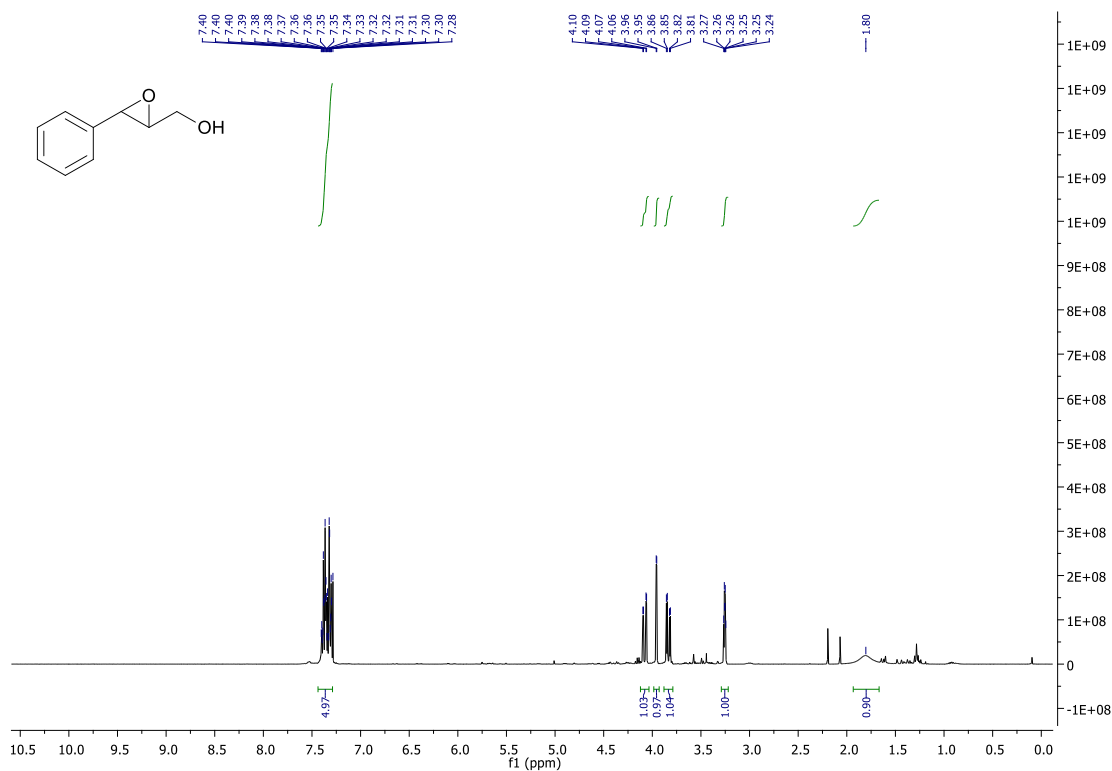

Fig. S19 <sup>1</sup>H Compound **12a-b** CDCl<sub>3</sub> 400 MHz

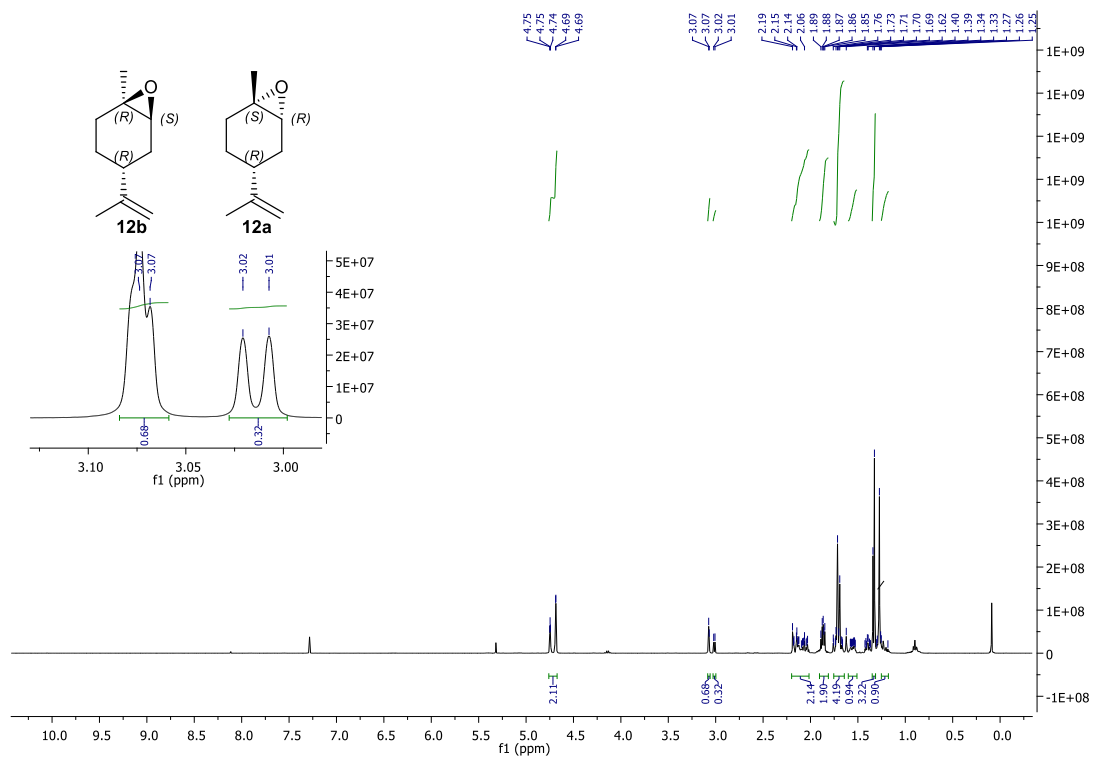

Fig. S20  $^{13}\text{C}$  Compound **12a-b**  $\text{CDCl}_3$  100 MHz

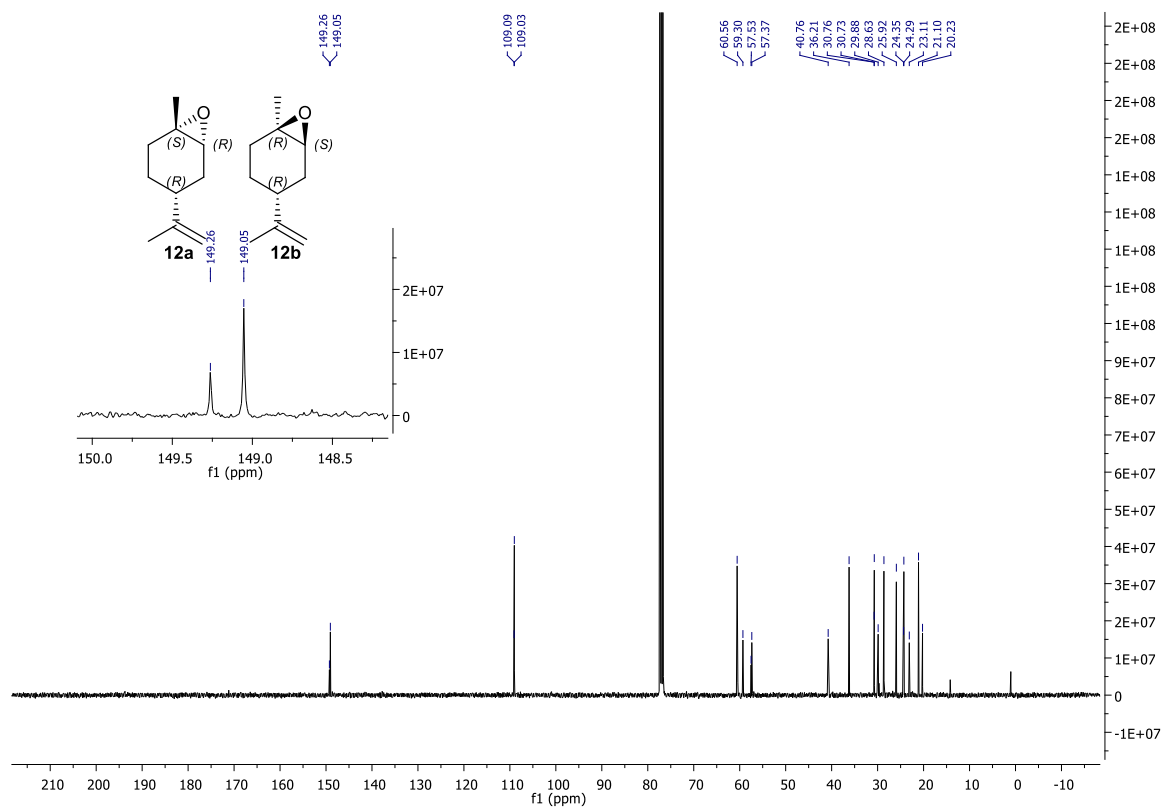

Fig. S21  $^1\text{H}$  Compound **12c-f**  $\text{CDCl}_3$  400 MHz

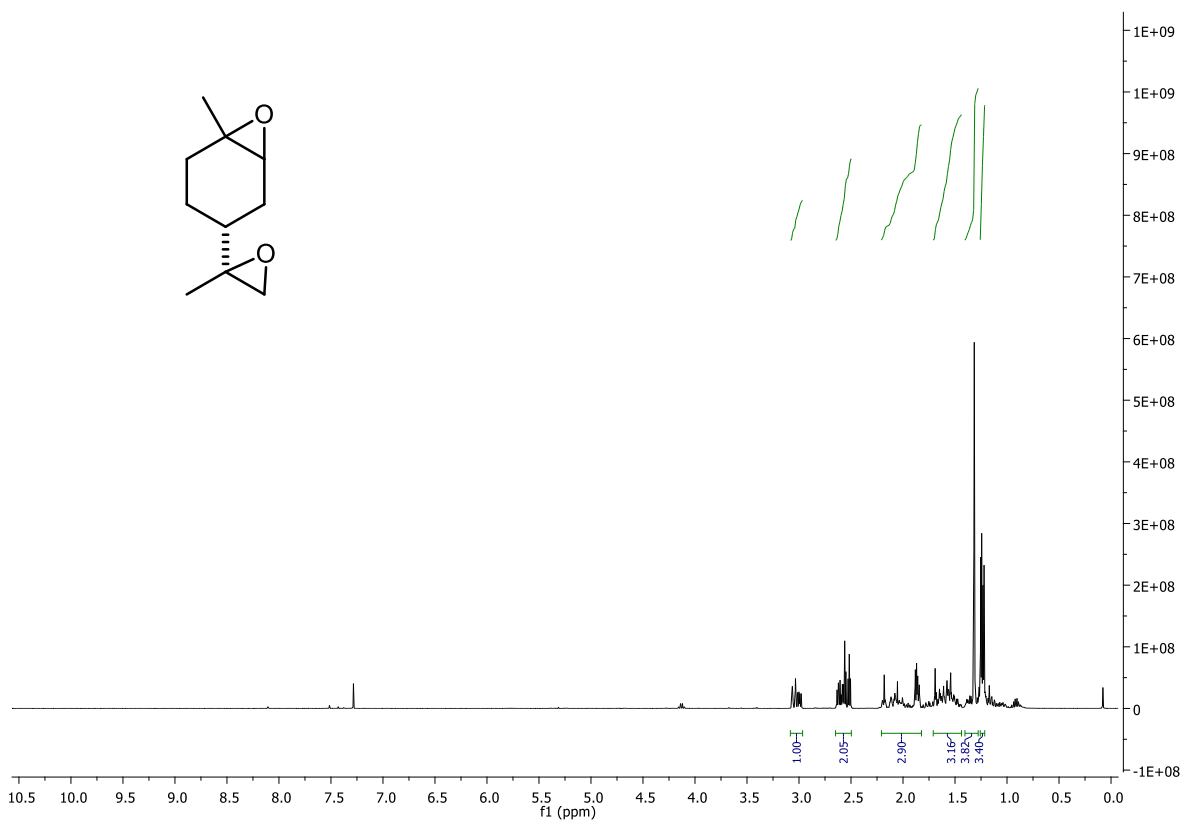

Fig. S22  $^{13}\text{C}$  Compound **12c-f**  $\text{CDCl}_3$  100 MHz

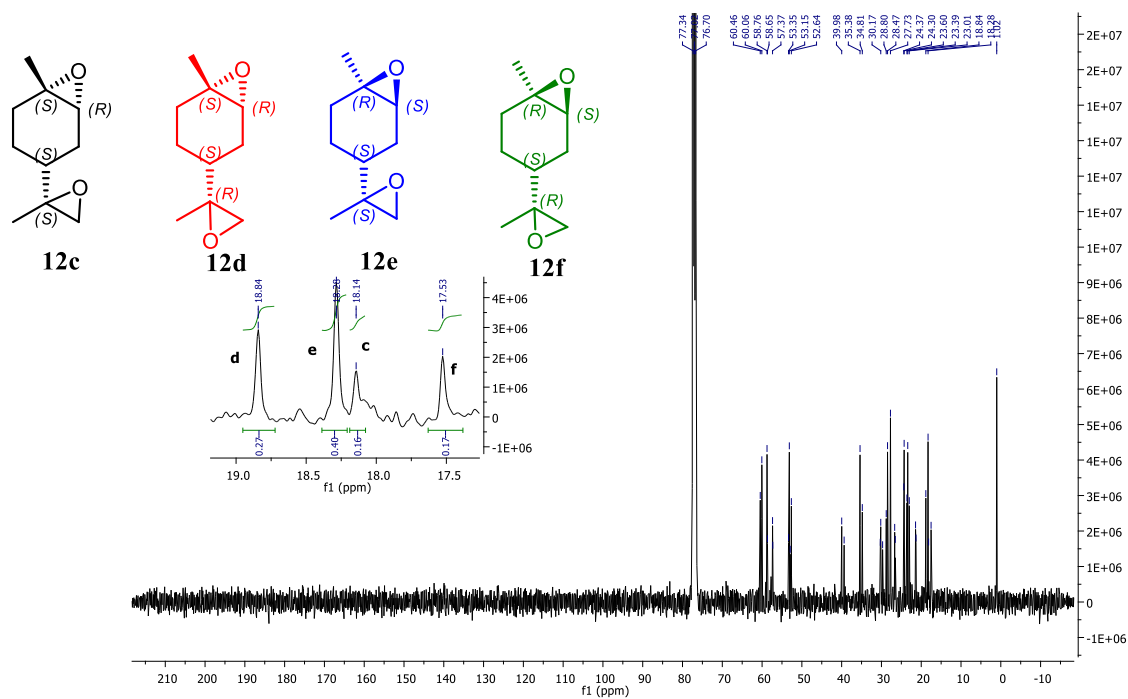

# HPLC chromatograms of epoxidation performed with 1

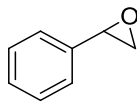

7a

Lux 5 $\mu$ m Cellulose 2, 95:5 hexane/2-propanol, 0.5 mL/min, monitor at 220 nm

## <Chromatogram>

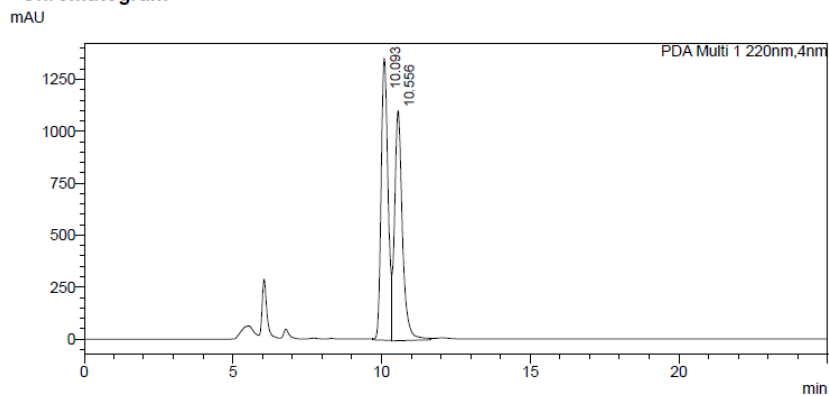

## <Peak Table>

PDA Ch1 220nm

| Peak# | Ret. Time | Area%   |
|-------|-----------|---------|
| 1     | 10.093    | 51.204  |
| 2     | 10.556    | 48.796  |
| Total |           | 100.000 |

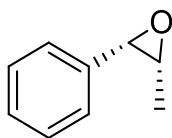

8a

Lux 5 $\mu$ m Cellulose 2, 90:10 hexane/2-propanol, 0.5 mL/min, monitor at 220 nm

## <Chromatogram>

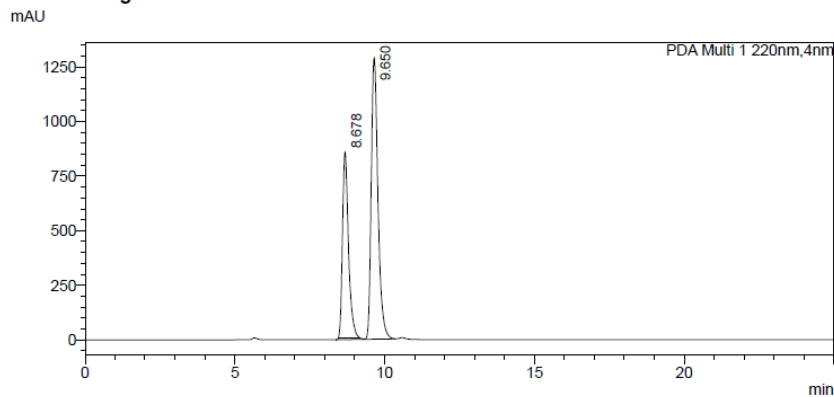

## <Peak Table>

PDA Ch1 220nm

| Peak# | Ret. Time | Area%   |
|-------|-----------|---------|
| 1     | 8.678     | 36.626  |
| 2     | 9.650     | 63.374  |
| Total |           | 100.000 |

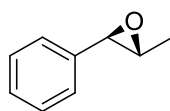

9a

Lux 5 $\mu$ m Cellulose 2, 90:10 hexane/2-propanol, 0.5 mL/min, monitor at 220 nm

<Chromatogram>

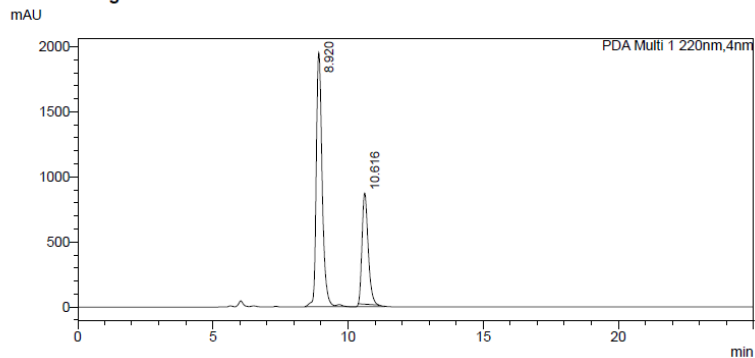

<Peak Table>

| PDA Ch1 220nm |           |         |
|---------------|-----------|---------|
| Peak#         | Ret. Time | Area%   |
| 1             | 8.920     | 69.569  |
| 2             | 10.616    | 30.431  |
| Total         |           | 100.000 |

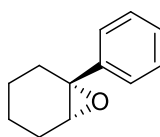

10a

Lux 5 $\mu$ m Cellulose 2, 95:5 hexane/2-propanol, 0.5 mL/min, monitor at 220 nm

<Chromatogram>

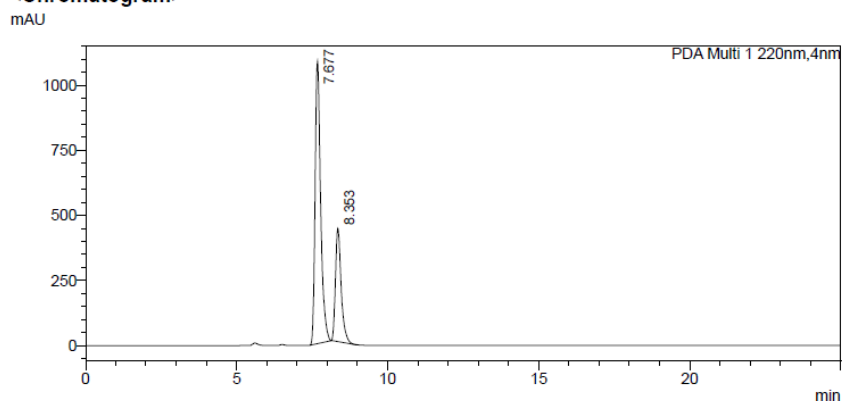

<Peak Table>

| PDA Ch1 220nm |           |         |
|---------------|-----------|---------|
| Peak#         | Ret. Time | Area%   |
| 1             | 7.677     | 70.740  |
| 2             | 8.353     | 29.260  |
| Total         |           | 100.000 |

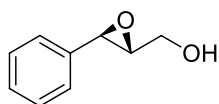

Lux 5 $\mu$ m Cellulose 2, 80:20 hexane/2-propanol, 0.5 mL/min, monitor at 210 nm

<Chromatogram>

mAU

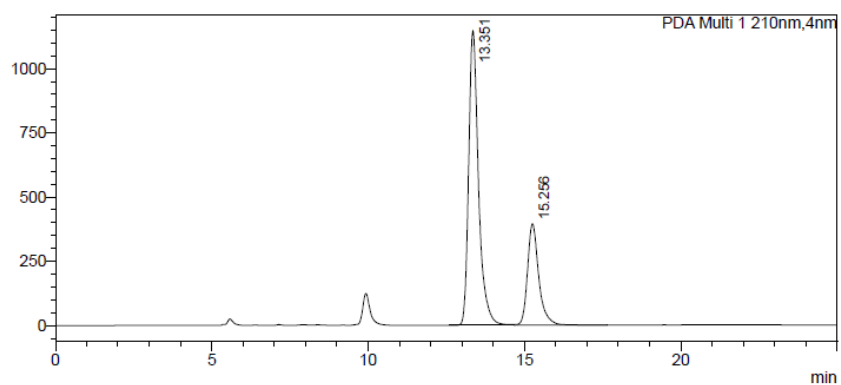

<Peak Table>

PDA Ch1 210nm

| Peak# | Ret. Time | Area%   |
|-------|-----------|---------|
| 1     | 13.351    | 71.759  |
| 2     | 15.256    | 28.241  |
| Total |           | 100.000 |

## HPLC chromatograms of epoxidation performed with 2

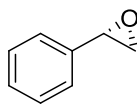

7a

Lux 5 $\mu$ m Cellulose 2, 95:5 hexane/2-propanol, 0.5 mL/min, monitor at 210 nm

### <Chromatogram>

mAU

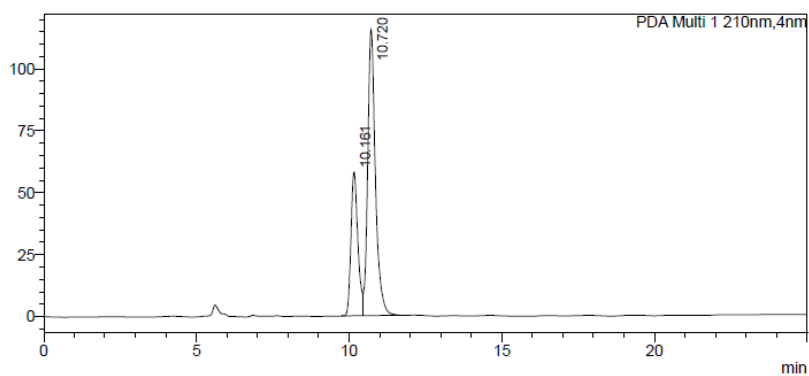

### <Peak Table>

PDA Ch1 210nm

| Peak# | Ret. Time | Area%   |
|-------|-----------|---------|
| 1     | 10.161    | 31.033  |
| 2     | 10.720    | 68.967  |
| Total |           | 100.000 |

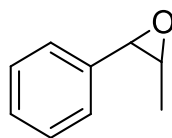

8a

Lux 5 $\mu$ m Cellulose 2, 90:10 hexane/2-propanol, 0.5 mL/min, monitor at 210 nm

### <Chromatogram>

mAU

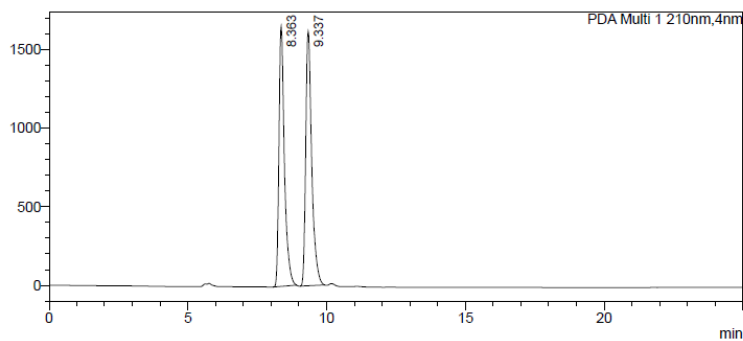

### <Peak Table>

PDA Ch1 210nm

| Peak# | Ret. Time | Area%   |
|-------|-----------|---------|
| 1     | 8.363     | 48.325  |
| 2     | 9.337     | 51.675  |
| Total |           | 100.000 |



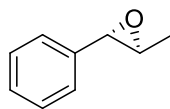

9a

Lux 5 $\mu$ m Cellulose 2, 90:10 hexane/2-propanol, 0.5 mL/min, monitor at 210 nm

<Chromatogram>

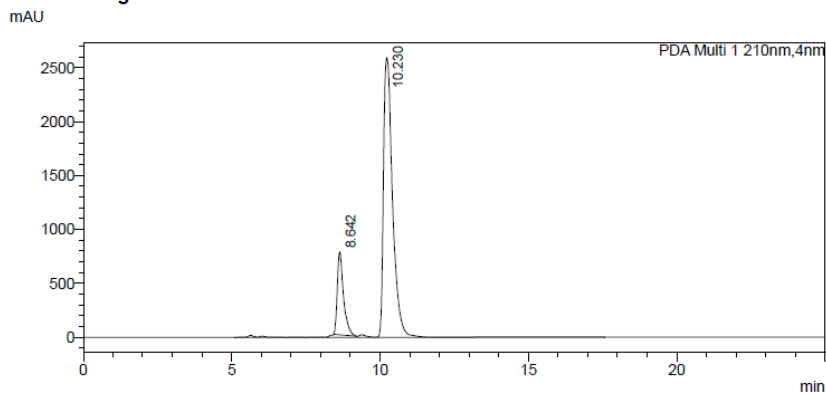

<Peak Table>

PDA Ch1 210nm

| Peak# | Ret. Time | Area%   |
|-------|-----------|---------|
| 1     | 8.642     | 16.366  |
| 2     | 10.230    | 83.634  |
| Total |           | 100.000 |

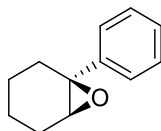

10a

Lux 5 $\mu$ m Cellulose 2, 95:5 hexane/2-propanol, 0.5 mL/min, monitor at 210 nm

<Chromatogram>

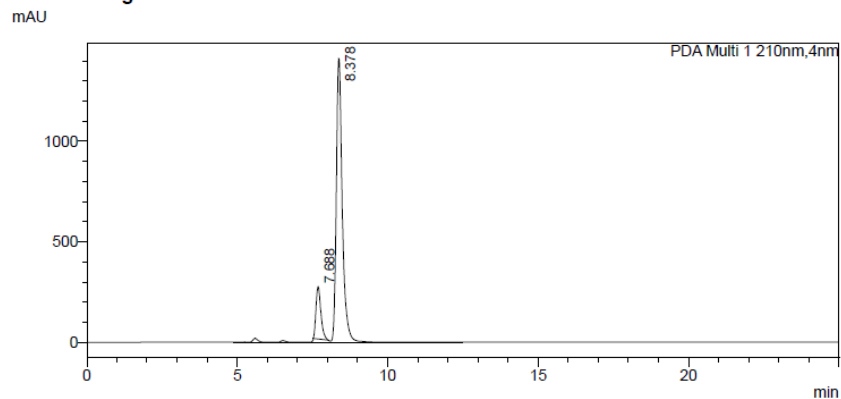

<Peak Table>

PDA Ch1 210nm

| Peak# | Ret. Time | Area%   |
|-------|-----------|---------|
| 1     | 7.688     | 12.602  |
| 2     | 8.378     | 87.398  |
| Total |           | 100.000 |

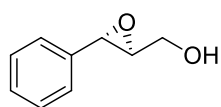

11a

Lux 5 $\mu$ m Cellulose 2, 80:20 hexane/2-propanol, 0.5 mL/min, monitor at 220 nm

<Chromatogram>

mAU

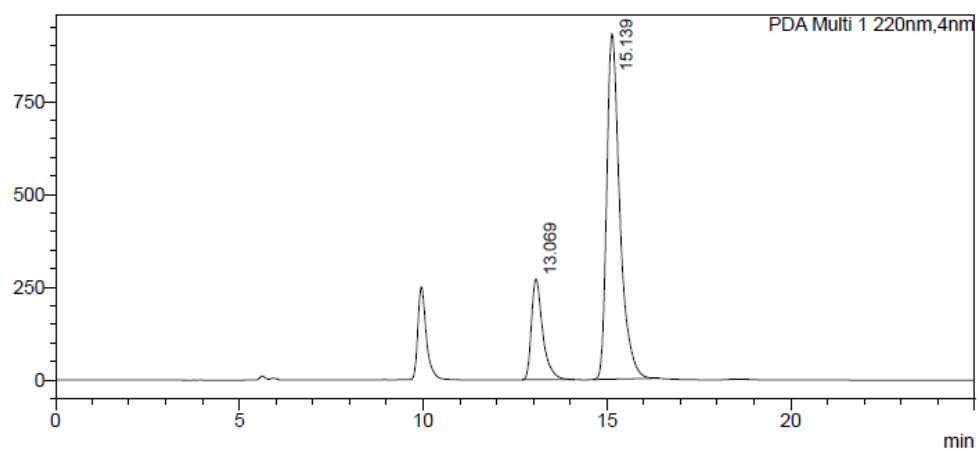

<Peak Table>

PDA Ch1 220nm

| Peak# | Ret. Time | Area%   |
|-------|-----------|---------|
| 1     | 13.069    | 20.018  |
| 2     | 15.139    | 79.982  |
| Total |           | 100.000 |

## HPLC chromatograms of racemic epoxides

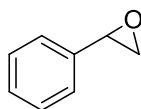

Lux 5 $\mu$ m Cellulose 2, 95:5 hexane/2-propanol, 0.5 mL/min, monitor at 220 nm

### <Chromatogram>

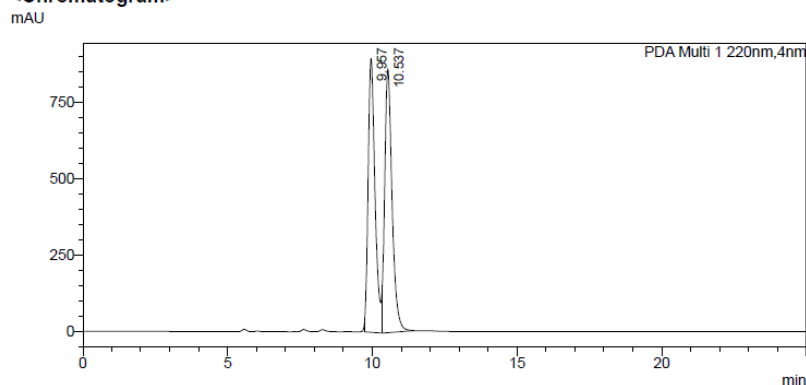

### <Peak Table>

PDA Ch1 220nm

| Peak# | Ret. Time | Area%   |
|-------|-----------|---------|
| 1     | 9.957     | 49.867  |
| 2     | 10.537    | 50.133  |
| Total |           | 100.000 |

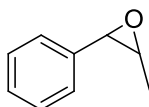

Lux 5 $\mu$ m Cellulose 2, 90:10 hexane/2-propanol, 0.5 mL/min, monitor at 220 nm

### <Chromatogram>

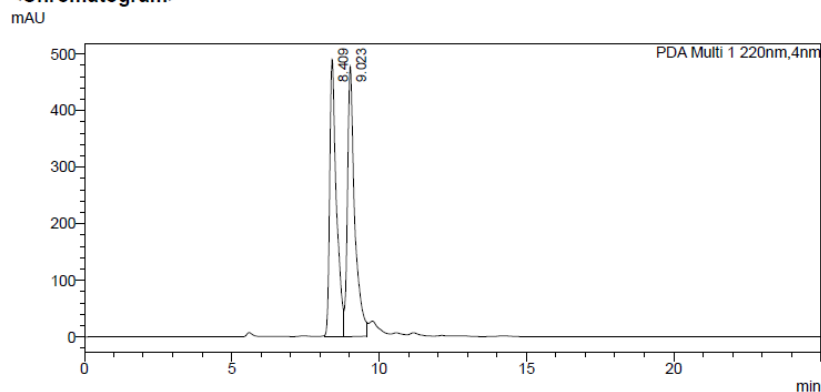

### <Peak Table>

PDA Ch1 220nm

| Peak# | Ret. Time | Area%   |
|-------|-----------|---------|
| 1     | 8.409     | 49.041  |
| 2     | 9.023     | 50.959  |
| Total |           | 100.000 |

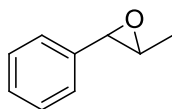

Lux 5 $\mu$ m Cellulose 2, 90:10 hexane/2-propanol, 0.5 mL/min, monitor at 220 nm

<Chromatogram>

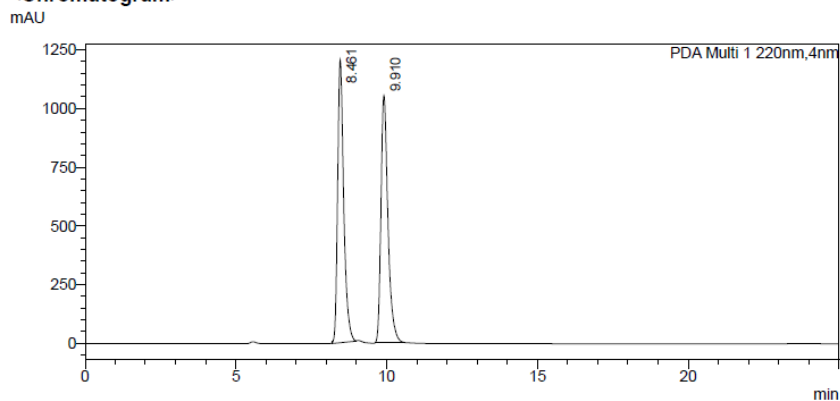

<Peak Table>

| PDA Ch1 220nm |           |         |
|---------------|-----------|---------|
| Peak#         | Ret. Time | Area%   |
| 1             | 8.461     | 49.920  |
| 2             | 9.910     | 50.080  |
| Total         |           | 100.000 |

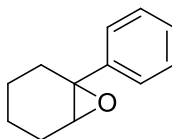

Lux 5 $\mu$ m Cellulose 2, 95:5 hexane/2-propanol, 0.5 mL/min, monitor at 220 nm

<Chromatogram>

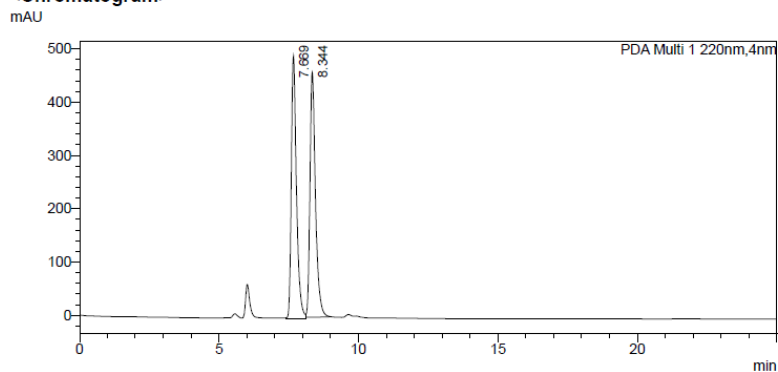

<Peak Table>

| PDA Ch1 220nm |           |         |
|---------------|-----------|---------|
| Peak#         | Ret. Time | Area%   |
| 1             | 7.669     | 49.918  |
| 2             | 8.344     | 50.082  |
| Total         |           | 100.000 |

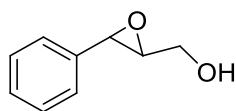

Lux 5 $\mu$ m Cellulose 2, 80:20 hexane/2-propanol, 0.5 mL/min, monitor at 220 nm

<Chromatogram>

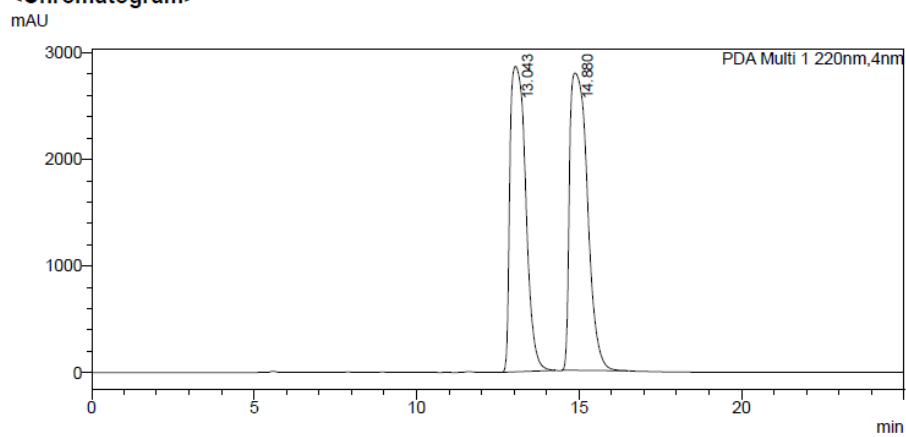

<Peak Table>

PDA Ch1 220nm

| Peak# | Ret. Time | Area%   |
|-------|-----------|---------|
| 1     | 13.043    | 47.569  |
| 2     | 14.880    | 52.431  |
| Total |           | 100.000 |
